1     **Histone H3 T11 phosphorylation by Sch9 and CK2 regulates lifespan by controlling**  
2                                   **the nutritional stress response**

3

4

5

6                                   Seunghye Oh<sup>1</sup>, Tamaki Suganuma<sup>1\*</sup>, Madelaine M. Gogol<sup>1</sup>,

7                                                                                   and Jerry L. Workman<sup>1\*</sup>

8

9     <sup>1</sup>Stowers Institute for Medical Research, 1000 E. 50<sup>th</sup> Street, Kansas City, MO 64110, USA

10

11    \*Co-corresponding authors

12    Email: [tas@stowers.org](mailto:tas@stowers.org)

13    Email: [jlw@stowers.org](mailto:jlw@stowers.org)

14

15

16

17

18

19

20

21

22

23 **Abstract**

24           Upon nutritional stress, the metabolic status of cells is changed by nutrient signaling  
25 pathways to ensure survival. Altered metabolism by nutrient signaling pathways has been  
26 suggested to influence cellular lifespan. However, it remains unclear how chromatin  
27 regulation is involved in this process. Here, we found that histone H3 threonine 11  
28 phosphorylation (H3pT11) functions as a marker for nutritional stress and aging. Sch9 and  
29 CK2 kinases cooperatively regulate H3pT11 under stress conditions. Importantly, H3pT11  
30 defective mutants prolonged chronological lifespan by altering nutritional stress responses.  
31 Thus, the phosphorylation of H3T11 by Sch9 and CK2 engages a nutritional stress response  
32 to chromatin in the regulation of lifespan.

33

34

35

36

37

38

39

40

41

42

## 43 **Introduction**

44 Nutritional stress is an unavoidable event for most of organisms, and appropriate metabolic  
45 adaptation to nutritional deficiency is essential to ensure the survival of cells and  
46 organisms. Given the fact that calorie restriction relates to the regulation of lifespan from  
47 yeast to mammals (Guarente, 2006), proper adaptations of metabolism due to nutritional  
48 changes may be critical processes in the regulation of lifespan. *Saccharomyces cerevisiae*  
49 utilizes different carbon sources and adapts to various nutritional environments by changing  
50 its metabolism (Broach, 2012). In yeast, glucose is the most preferred carbon source for  
51 their growth. When external glucose levels are sufficient, they utilize fermentation for  
52 energy production even if the oxygen concentration is high, which resembles the Warburg  
53 effect seen in stem cells and cancer cells (Vander Heiden, Cantley, & Thompson, 2009).  
54 When the levels of glucose and other fermentable carbon source run low, they shift energy  
55 metabolism from fermentation to the mitochondrial respiration pathway. Multiple signaling  
56 pathways including PKA/Ras, TOR, Sch9 cooperate to regulate the metabolic transition  
57 (Galdieri, Mehrotra, Yu, & Vancura, 2010; Wilson & Roach, 2002), which is accompanied  
58 by global changes in gene expression (DeRisi, Iyer, & Brown, 1997). Many factors  
59 important for regulation of the metabolic transition are also involved in the process of  
60 cellular aging (Cheng et al., 2007). Downregulation of the TOR, Sch9, and PKA/Ras2  
61 pathways leads extension of lifespan (Fabrizio, Pozza, Pletcher, Gendron, & Longo, 2001;  
62 Longo, 1999; Powers, Kaeberlein, Caldwell, Kennedy, & Fields, 2006; Wei et al., 2008).  
63 Chromatin modifying enzymes also play roles in aging (Benayoun, Pollina, &  
64 Brunet, 2015; Sen, Shah, Nativio, & Berger, 2016). The sirtuin deacetylase Sir2 regulates

65 lifespan by reducing histone H4 lysine 16 acetylation (H4K16ac) levels at telomere (W.  
66 Dang et al., 2009). Inactivation of a chromatin remodeling protein, Isw1, extends lifespan  
67 by induction of genotoxic stress response genes (Weiwei Dang et al., 2014). However,  
68 direct connections between nutrition sensing pathways and chromatin regulation in the  
69 aging process are still unknown. Interestingly, pyruvate kinases in yeast and humans have  
70 been shown to phosphorylate H3 at T11 (Li et al., 2015; Yang et al., 2012), suggesting that  
71 H3pT11 mediates a connection between metabolism and chromatin. Several different  
72 kinases are responsible for H3T11 phosphorylation. In yeast, Mek1 directly regulate H3T11  
73 phosphorylation during meiosis (Govin et al., 2010; Kniewel et al., 2017). In human,  
74 protein kinase N1, PKN1, phosphorylates H3T11 at promoters of androgen receptor  
75 dependent genes (Metzger et al., 2008), and checkpoint kinase 1, Chk1, phosphorylates  
76 H3T11 in mouse embryonic fibroblast cells (Shimada et al., 2008).

77 Casein kinase 2 complex, CK2, is a ubiquitous serine/threonine kinase complex and  
78 plays roles in cell growth and proliferation. CK2 is a conserved protein complex from yeast  
79 to human. Yeast CK2 consists of two catalytic subunits (a1 and a2) and two regulatory  
80 subunits (b1 and b2) (Ahmed, Gerber, & Cochet, 2002; Litchfield, 2003). CK2  
81 phosphorylates many kinds of substrates including histones (Basnet et al., 2014; Cheung et  
82 al., 2005; Franchin et al., 2017), and this pleiotropy implies a broad function of CK2 in  
83 various biological pathways including glucose metabolism (Borgo et al., 2017).  
84 Interestingly, deletion of a CK2 catalytic subunit, Cka2, extends lifespan in yeast; however,  
85 the mechanism of how CK2 regulates lifespan is unknown (Fabrizio et al., 2010).

86 Here, we found that upon nutritional stress in yeast, the level of H3T11

87 phosphorylation specifically increased at stress responsive genes and regulates transcription  
88 of genes involved the metabolic transition. We also found that Sch9 and Cka1, a catalytic  
89 subunit of CK2, are required for the phosphorylation of H3pT11 under the stress.  
90 Importantly, loss of H3T11 phosphorylation prolongs lifespan by altering the stress  
91 response at an early stage of chronological lifespan (CLS), suggesting that H3T11  
92 phosphorylation by CK2 and Sch9 links nutritional stress to chromatin during the process  
93 of aging.

94

## 95 **Results**

### 96 **H3T11 phosphorylation is increased upon the nutritional stress.**

97 Our previous study implied a connection between H3pT11 and glucose metabolism (Li et  
98 al., 2015), we therefore examined the relationship between H3pT11 and external glucose  
99 levels using an antibody specific to H3pT11 (validated in Figure 1-figure supplement 1).  
100 Culture media for wild type (WT) cells was changed from glucose rich (2%) YPD to YP  
101 with different concentrations of glucose (0.02%, 0.2%, or 2%). The global levels of  
102 H3pT11 showed a clear negative correlation with media glucose levels (Figure 1A). When  
103 the culture media was shifted from YPD to YP with 3% glycerol (YPglycerol), which is  
104 non-fermentable and is nutritionally unfavorable carbon source for yeast, we also observed  
105 robust increases in the levels of H3pT11 (Figure 1B). H3pT11 levels were not changed in  
106 media containing both glucose and glycerol compared to the 2% glucose condition, and  
107 direct addition of glucose was sufficient to suppress the increase of H3pT11 levels found in

108 YPglycerol (Figure 1-figure supplement 2A). These data demonstrate that H3pT11 levels  
109 are specifically increased in low glucose conditions.

110 To ask how the genomic distribution of H3pT11 changes upon nutritional stress, we  
111 performed ChIP-sequencing (ChIP-seq) of H3pT11 in cells cultured in YPD or YPglycerol  
112 conditions. In agreement with the Western blots (Figure 1B), the total number of H3pT11  
113 peaks increased in YPglycerol conditions compared to YPD (Figure 1-figure supplement  
114 2B). We identified 366 genes, whose H3pT11 levels were increased upon this nutritional  
115 stress (Figure 1C). These genes included hexokinase, *HXK1*, and mitochondrial lactate  
116 dehydrogenase, *DLD1*, whose expression are known to increase in low glucose conditions  
117 (Lodi, Alberti, Guiard, & Ferrero, 1999; Rodriguez, De La Cera, Herrero, & Moreno, 2001)  
118 (Figure 1D). Through GO term analysis of the genes, where H3pT11 levels were changed  
119 upon the stress (YPglycerol), we found that the genes with increased H3pT11 levels were  
120 highly enriched in aging-related processes, stress responses, and metabolic pathways  
121 (Figure 1E). H3pT11 levels were decreased at 139 genes (Figure 1-figure supplement 2C)  
122 in YPglycerol compared to YPD. The genes with reduced H3pT11 levels were involved in  
123 fermentation and translation, which are generally repressed in nutritional stress conditions  
124 (Figure 1-figure supplement 2D). These results show that H3pT11 levels are specifically  
125 changed at a group of genes involved in the nutritional stress responses.

126

### 127 **H3T11 phosphorylation regulates transcription upon nutritional stress.**

128 The genome-wide distribution of H3pT11 strongly suggests that H3pT11 has a role in  
129 regulation of the transcriptional response to nutritional stress. We classified RNA

130 polymerase II (Pol II) regulated genes into 5 groups based on their mRNA expression levels  
131 of RNA-sequencing (RNA-seq) in YPglycerol condition and compared H3pT11 levels  
132 among those 5 groups. H3pT11 levels were mostly enriched in promoter regions. In these  
133 regions, the H3pT11 signals were positively correlated with mRNA expression levels in the  
134 YPglycerol condition (Figure 2A). We compared transcripts in H3T11A mutant to those in  
135 WT, cultured in YPD or YPglycerol by RNA-seq. We found a negative correlation of gene  
136 expression between YPglycerol dependence (x-axis) and H3T11A dependence (y-axis)  
137 with correlation coefficient (cor) -0.38 (Figure 2B). Thus, genes with increased expression  
138 in YPglycerol tended to be down-regulated the in H3T11A mutant, while genes with  
139 decreased expression in YPglycerol were up-regulated in H3T11A mutant.

140       Upon nutritional stress, glucose fermentation pathway genes revealed a stronger  
141 negative correlation (cor = -0.82) between H3pT11 dependence (y- axis) and YPglycerol  
142 dependence (x-axis) compared to the correlation of all genes (cor = -0.38) (Figure 2C upper  
143 left panel). Transcripts of the genes related to the TCA cycle and the oxidative  
144 phosphorylation pathway were mostly upregulated upon the stress and relatively down-  
145 regulated in the H3T11A mutant (Figure 2C lower panels). Interestingly, this trend did not  
146 match for transcripts of gluconeogenesis specific genes (Figure 2C upper right panel). The  
147 transcription of these genes was upregulated in the H3T11A mutant, regardless of their  
148 transcriptional changes in YPglycerol condition. As well as carbon source metabolism  
149 involved genes, the transcription of cellular compartment genes was also affected by  
150 H3pT11 defect. For example, there are two classes of ribosomal genes in yeast. One is  
151 cytoplasmic ribosomal genes, and the other is mitochondrial ribosomal genes. In the stress

152 condition, the transcription of cytoplasmic ribosomal genes was downregulated, while  
153 transcription of mitochondrial ribosomal genes was upregulated (Figure 2D upper panel).  
154 Interestingly, in the H3T11A mutant, the cytoplasmic genes were upregulated, while  
155 mitochondrial genes were downregulated in YPglycerol, compared to WT (Figure 2D lower  
156 panel). Altogether, these data indicated that H3pT11 regulates the transcription of the genes  
157 involved in the metabolic transition to the mitochondrial respiratory pathways upon  
158 nutritional stress.

159

### 160 **Cka1 is responsible for H3T11 phosphorylation upon nutritional stress.**

161 We next asked which kinases are responsible for this modification under nutritional stress  
162 conditions. We previously showed that Pyruvate kinase 1 (Pyk1 or Cdc19) in the SESAME  
163 (Serine-responsive SAM-containing metabolic enzyme) complex phosphorylates H3pT11  
164 under nutrient rich YPD conditions (Li et al., 2015). However, Pyk1 expression is greatly  
165 reduced in low glucose conditions (Boles et al., 1997). In YPglycerol condition, we did not  
166 observe a clear difference in the global levels of H3pT11 in the SESAME subunit mutants  
167 compared to that in WT (Figure 3-figure supplement 1). This pointed to a role of different  
168 kinase(s) in H3pT11 under YPglycerol. To identify other kinase(s) responsible for H3pT11,  
169 we tested several kinases including known H3pT11 kinases in yeast and other organisms  
170 (Govin et al., 2010; Kniewel et al., 2017; Metzger et al., 2008; Shimada et al., 2008). The  
171 global levels of H3pT11 were similar among *chk1Δ*, deletion of the yeast homolog of  
172 mouse Chk1, *mek1Δ*, and WT (Figure 3-figure supplement 2A). Unexpectedly, H3pT11  
173 was decreased in the *ckalΔ* mutant. Interestingly, H3pT11 levels were unaffected upon



174 deletion of another catalytic subunit of CK2, *cka2Δ* mutant (Figure 3A and Figure 3-figure  
175 supplement 2A), although Cka1 and Cka2 have been thought to be functionally redundant  
176 (Chen-Wu, Padmanabha, & Glover, 1988; Padmanabha, Chen-Wu, Hanna, & Glover,  
177 1990). Deletion of the regulatory subunits, *ckb1Δ* and *ckb2Δ*, also did not affect H3pT11  
178 levels (Figure 3-figure supplement 2B). Thus, we examined whether CK2 complex  
179 phosphorylated H3T11 by an *in vitro* kinase assay using TAP-purified CK2 complex,  
180 recombinant H3 (rH3), and ATP. The purified CK2 complex clearly phosphorylated H3T11  
181 (Figure 3B). We also confirmed the substrate specificity of CK2 phosphorylation at H3T11  
182 as seen in no-signals on purified recombinant H3T11A mutant by *in vitro* kinase assay  
183 (Figure 3C). Importantly, when we measured the global levels of H3pT11 in YPglycerol  
184 condition, the H3pT11 levels were significantly reduced in *cka1Δ* mutant compared to WT  
185 or *cka2Δ* mutant (Figure 3D), indicating Cka1 is responsible for the phosphorylation of  
186 H3T11 upon nutritional stress.

187

### 188 **Sch9 regulates H3T11 phosphorylation upon nutritional stress.**

189 Since H3pT11 levels respond to glucose levels in the media (Figure 1), we further  
190 examined whether H3pT11 level is related to glucose-sensing pathways. Sch9, PKA, and  
191 TOR pathways are responsible for glucose sensing in the context of calorie restriction  
192 (Powers et al., 2006). Sch9, Ras2, and Tor1 proteins are key enzymes in each pathway. To  
193 ask whether these pathways were involved in the H3pT11 regulation, we compared the  
194 H3pT11 levels among *sch9Δ*, *ras2Δ*, *tor1Δ* mutants and WT in YPglycerol condition.  
195 Interestingly, H3pT11 increases were significantly impaired only in the *sch9Δ* mutant but

196 not in the *ras2Δ* or *tor1Δ* mutants cultured in YPglycerol (Figure 4A), suggesting H3pT11  
197 levels depended on Sch9 pathway. In support of this observation we found that TAP  
198 purified Sch9 protein could directly phosphorylate H3T11 *in vitro* (Figure 4B). As both  
199 CK2 and Sch9 were responsible for H3pT11 *in vivo* (Figures 3A and 4A) and were able to  
200 phosphorylate H3T11 *in vitro* (Figures 3B and 4B), we examined if CK2 and Sch9  
201 phosphorylate H3T11 in a cooperative or independent manner *in vivo*. We measured the  
202 global levels of H3pT11 in *sch9ΔckalΔ* double mutant in YPglycerol. Interestingly,  
203 *sch9ΔckalΔ* double mutant showed similar H3pT11 level compared to *ckalΔ* alone (Figure  
204 4C). Thus, Sch9 and CK2 are not independent of each other but have overlapping function  
205 in regulation of H3pT11 upon nutritional stress.

206

### 207 **H3T11 phosphorylation regulates lifespan.**

208 Glucose sensing pathways are closely related to lifespan control from yeast to mammals  
209 (Cheng et al., 2007), and deletion of Sch9 is a well-known long-lived mutant in yeast  
210 (Fabrizio et al., 2001). H3pT11 was tightly controlled by media glucose levels (Figure 1),  
211 and Sch9 is responsible for H3T11 phosphorylation (Figure 4). We therefore asked whether  
212 H3pT11 is involved in lifespan regulation by chronological lifespan (CLS) assays, which  
213 measures the length of time that non-dividing yeast cells survive (Longo, Shadel,  
214 Kaeberlein, & Kennedy, 2012). Strikingly, lifespan was significantly extended in the  
215 H3T11A mutant compared to the WT strain (Figure 5A). In addition, *ckalΔ* mutant also  
216 extended lifespan (Figure 5B). However, *sch9ΔckalΔ* mutant did not further extend the  
217 lifespan of *ckalΔ* or *sch9Δ* single mutant (Figure 5C). These data suggest that Sch9 and

218 CK2 cooperatively regulate lifespan as in the case of H3pT11 regulation.

219 Sch9 and CK2 might regulate the lifespan by controlling the phosphorylation of  
220 H3T11 in response to alteration of glucose levels during chronological aging. To address  
221 this hypothesis, we tracked H3pT11 levels during the CLS assay. Interestingly, global  
222 levels of H3pT11 were significantly increased at day 1 after inoculation and then reduced  
223 (Figure 5D). At this time point, media glucose is depleted by consumption (Figure 5E), and  
224 yeast cells begin to change the utilization of its carbon source metabolism from  
225 fermentation to respiration (DeRisi et al., 1997; Galdieri et al., 2010), the process regulated  
226 by H3pT11 in nutritional stress conditions (Figure 2). Supplying glucose at day1 after  
227 inoculation suppressed the elevation of H3pT11 levels (Figure 5F). These data suggest that  
228 the increase in H3pT11 levels at early stage of CLS is anti-correlated with glucose  
229 availability in the media, and H3T11 phosphorylation mediated by Sch9 and CK2 affects  
230 lifespan by regulating the metabolic transition at this time point.

231

### 232 **H3pT11 controls lifespan by regulation of acid stress response.**

233 Upon depletion of glucose, yeast cells encounter several stresses including media  
234 acidification. Glucose depleted media becomes acidified, especially by acetic acid produced  
235 during early stage of the CLS assay. Media acidification has been suggested as a pro-aging  
236 factor, and the glucose sensing pathway via Sch9 is responsible for acetic acid stress  
237 response (Burtner, Murakami, Kennedy, & Kaeberlein, 2009; Fabrizio et al., 2005; Longo  
238 et al., 2012). To know whether impaired H3pT11 affects acidification or the levels of acetic  
239 acid in the media, we measured media acetate level and pH during CLS analysis. There

240 were no significant differences in media pH and acetate level between WT and H3T11A  
241 during the first few days of CLS (Figure 6-figure supplement 1A and 1B). Indeed, the  
242 media acetate levels were even slightly higher in H3T11A mutant. However, H3T11A, and  
243 *cka1Δ* mutants, as well as *sch9Δ* mutant displayed strong resistance against high  
244 concentration of acetic acid in the media (Figures 6A and 6B). In addition, *sch9Δcka1Δ*  
245 mutant showed similar acetic acid resistance to *sch9Δ* single mutant (Figure 6B), as in the  
246 case of lifespan control (Figure 5C). We thought that extended lifespan in H3T11  
247 phosphorylation defective mutants (H3T11A, *cka1Δ*, *sch9Δ*, and *sch9Δcka1Δ*) might be  
248 correlated to their resistance to acetic acid. Supporting this idea, buffering media to pH 6.0  
249 abolished the extension of lifespan in H3T11A or *cka1Δ* (Figure 6C and Figure 6-figure  
250 supplement 1C). High level of acetic acid in the media disrupts glucose metabolism (Sousa,  
251 Ludovico, Rodrigues, Leão, & Côrte-Real, 2012). We observed that media glucose levels  
252 remained stable (i.e. glucose was not consumed) even after 24 hours of WT culture in 50  
253 mM acetic acid containing SDC media (Figure 6-figure supplement 1D), suggesting  
254 impairment of glucose utilization after acetic acid treatment. By contrast, media glucose  
255 was consumed in 10 mM acetic acid condition, similar to the physiological acetic acid  
256 concentration of the media during CLS analysis (Figure 6-figure supplement 1D)(Longo et  
257 al., 2012). As H3pT11 responds to low glucose condition (Figure 1), we tested whether  
258 media acetic acid affects H3pT11 level. Indeed, H3pT11 was induced by 50mM acetic acid  
259 treatment, but not by 10mM acetic acid treatment (Figure 6-figure supplement 1E). In  
260 50mM acetic acid condition, the H3pT11 increase was impaired in *cka1Δ*, *sch9Δ*, and  
261 *cka1Δsch9Δ* mutants (Figures 6D and 6E). These data indicate that acetic acid and low

262 glucose stress response participate in the same pathway depending on both Sch9 and CK2.  
263 Hence, we conclude that H3pT11 mediated by CK2 and Sch9 controls lifespan by  
264 regulation of the stress responses at early stage of CLS.

265

### 266 **H3T11 phosphorylation is increased in aged cells.**

267 Since H3pT11 defective mutants displayed extension of CLS, we asked if H3pT11 level  
268 was changed in aged cells. To address this question, we used the yeast Mother Cell  
269 Enrichment (MEP) system strain, which selects the mother cells in the presence of estradiol  
270 (D. L. Lindstrom & D. E. Gottschling, 2009) (Figure 7-figure supplement 1A). As  
271 expected, estradiol treated yeast populations accumulated bud scars, a sign of many iterated  
272 divisions, relative to no estradiol controls (Figure 7A), indicating this method selectively  
273 isolates aged cells. In these cells, we observed an increase in the levels of H4K16  
274 acetylation (H4K16ac), which is well known marker for aged cells (Figure 7B) (W. Dang et  
275 al., 2009). Importantly, we found that H3pT11 levels were also significantly increased in  
276 the aged cells (Figure 7B). Addition of estradiol into the media or ectopic expression of  
277 Cre-EBD78 protein did not cause the increase of H3pT11 and H4K16ac (Figure 7-figure  
278 supplement 1B). Thus, the levels of H3T11 phosphorylation increased by aging.

279

## 280 **Discussion**

281

### 282 **Cooperation of Sch9 and CK2**

283 In this work, we identified novel functions of H3pT11 in nutritional stress conditions.

284 H3pT11 specifically increased in nutritional stress conditions. H3pT11 regulates  
285 transcription upon stress and accelerates aging or cell death. The phosphorylation of H3T11  
286 upon nutritional stress depends on the Sch9 and CK2 kinases (Summarized in Figure 7C).  
287 Our data indicate that Sch9 and CK2 act in overlapping manner in the regulation of  
288 H3pT11, acetic acid resistance, and aging (Figures 4C, 5C and 6B). Interestingly, CK2 has  
289 been shown to phosphorylate Sch9 human homologs S6 kinase (Panasyuk et al., 2006) and  
290 Akt1 (Di Maira et al., 2005), and Akt1 also phosphorylates CK2 (Mitchell, 2013). In  
291 addition, Sch9 and CK2 share some common targets in yeast, including transcription factor  
292 Maf1 and Bdp1 (Graczyk et al., 2011; Lee, Moir, & Willis, 2009, 2015). Sch9 has been  
293 suggested to bind to Ckb1, one of CK2 regulatory subunits (Fasolo et al., 2011). These data  
294 strongly suggest the intimate relationship between Sch9 and CK2. However, how these two  
295 enzymes coordinately regulate H3pT11 upon nutrient stress condition in yeast need to be  
296 determined.

297

### 298 **Transcription regulation by H3pT11**

299 H3pT11 levels have been correlated with transcription regulation. In a human prostate  
300 tumor cell line, H3pT11 mediated by PKN1 is required for androgen stimulated gene  
301 transcription by facilitating removal of the repressive H3K9 methylation mark (Metzger et  
302 al., 2008). In mouse MEF cells, H3pT11 by Chk1 kinase is reduced upon DNA damage,  
303 and H3pT11 decrease causes repression of gene transcription, and reduction of H3K9  
304 acetylation by GCN5 (Shimada et al., 2008). We also demonstrated the roles of H3pT11 in  
305 transcription regulation (Figure 2). Yeast Gcn5 has been suggested to bind better to H3S10

306 phosphorylation (H3pS10) or H3pT11 containing peptides than unmodified H3 peptides  
307 (Shimada et al., 2008). Interestingly, the study of Tetrahymena Gcn5 structure suggests that  
308 H3pS10 may facilitate the interaction between H3pT11 and Gcn5. It has been shown that  
309 H3pT11 is required for optimal transcription of H3pS10 dependent gene transcription in  
310 yeast (Clements et al., 2003), suggesting that crosstalk among H3pT11 and other histone  
311 modifications may have roles in the regulation of transcription.

312

### 313 **Lifespan regulation by H3pT11**

314 H3pT11 defective mutants showed extended lifespan (Figure 5A) by altering stress  
315 response to low levels of glucose (Figure 2) and high levels of acetic acid (Figure 6A).  
316 High levels of acetic acid strongly disrupted glucose metabolism (Figure 6-figure  
317 supplement 1D) and induced H3pT11 (Figure 6C). Although we cannot exclude the  
318 possibility that other unknown stimuli are responsible for H3pT11 increase in acetic acid  
319 stress other than glucose starvation, the pathways regulated by Sch9 and CK2 were required  
320 for achieving acetic acid resistance and H3pT11 elevation (Figure 6D) in the case of low  
321 glucose (Figure 1). It has been suggested that utilizing ethanol and acetate, which are  
322 representative end-products of yeast fermentation, accelerates yeast aging, while  
323 maintaining glucose dependent pathways by gluconeogenesis is beneficial to yeast survival  
324 (Orlandi, Ronzulli, Casatta, & Vai, 2013). Recently, calorie restriction has been suggested  
325 to prolong lifespan by expanding the period of fermentation to respiration metabolic  
326 transition (Wierman, Maqani, Strickler, Li, & Smith, 2017). These results emphasize that  
327 the metabolic changes happened at early stage of CLS are critical for determination of

328 lifespan, and our data indicate that H3pT11, mediated by Sch9 and CK2, is involved in the  
329 metabolic changes of this stage.

330

### 331 **H3pT11 upon aging**

332 The levels of H3pT11 were increased when media glucose was depleted (Figures 1A and  
333 1B). This feature is correlated with lifespan extension in H3pT11 defective mutants. The  
334 culture of aged MEP strain cells was not saturated in our experimental conditions (see  
335 STAR Methods), suggesting that the culture media contains sufficient glucose for their  
336 survival. It can be speculated that the metabolic states of aged cells resemble the nutritional  
337 stress state. In aged cells, the abundance of histones is decreased, and overexpression of  
338 histones extends lifespan in yeast (Feser et al., 2010; Hu et al., 2014; O'sullivan, Kubicek,  
339 Schreiber, & Karlseder, 2010). Interestingly, reduced histone abundance induces respiration  
340 in yeast (Galdieri, Zhang, Rogerson, & Vancura, 2016). Leaky induction of respiration by  
341 reduction of histone abundance may increase the levels of H3pT11 in aged cells.  
342 Comparison of metabolites in the cells between nutritional stress and aging would be useful  
343 for examining this.

344 H4K16ac is increased only in aged cells but not in nutritional stress condition  
345 (Figures 1A, 1B, and 7B). Thus, H4K16ac and H3pT11 may act in different pathways or in  
346 different periods during aging although both modifications are involved in lifespan  
347 regulation. The chromatin state in aged cells may be more complex, one of which may be  
348 similar to nutritional stress conditions. However, our study clearly showed the functional



349 crosstalk between nutrition sensing pathways and chromatin regulation mediated by Sch9,  
350 CK2 and H3pT11, in controlling cellular lifespan.

351

## 352 **Materials and Methods**

353

### 354 **Yeast strains**

355 All yeast strains used in this study are described in Supplementary file 1. All single  
356 deletion mutants using KanMX4 marker and TAP tagged strains using HIS3 marker  
357 derived from BY4741 and BY4742 were obtained from Open Biosystems library  
358 (maintained at the Stowers Institute Molecular Biology facility). Histone H3 mutant  
359 shuffle strains were generated and maintained by Stowers Institute Molecular Biology  
360 facility (Nakanishi et al., 2008). Further deletion from these strains were achieved by  
361 targeted homologous recombination of PCR fragments containing marker genes flanked by  
362 the ends of the targeted genes. These strains were confirmed by PCR with primer set  
363 specific for their deletion marker or coding regions.

364

### 365 **Yeast culture conditions**

366 Overnight saturated cell cultures were diluted into fresh YPD media and incubated until  
367 early mid-log phase. For nutritional stress experiments, these cultures were pelleted and  
368 washed once with YP containing no carbon source. Washed pellets were resuspended with  
369 YP media containing various concentrations of glucose as described in Figure 1A or 3%  
370 glycerol in elsewhere, and incubated at 30°C. For ‘glucose added’ samples in Figure 1-

371 figure supplement 2A and Figure 5F, 2% glucose were directly added to the culture in  
372 YPglycerol (Figure 1-figure supplement 2A) or day 1 culture in SDC (Figure 5F) for 1hr, at  
373 30°C. For *cdc19-1* temperature sensitive mutant in Figure S3A, the cells were cultured in  
374 YPD at 25°C and were then shifted to YP-glycerol media at 37°C.

375

### 376 **Isolation of aged cells using MEP strains**

377 Isolation of aged cells using Mother cell Enrichment Program (MEP) strains was  
378 performed as previously described with minor modifications (Derek L Lindstrom & Daniel  
379 E Gottschling, 2009). Saturated cultures of MEP strains were diluted into 50 mL fresh YPD  
380 media and incubated at 30°C for overnight. Optical densities (OD) of the cultured cells  
381 were not exceed 1.0 after incubation. Cultures were inoculated to 100mL YPD media  
382 containing 1  $\mu$ M 17 $\beta$ -Estradiol (Sigma) to a cell density of  $4 \times 10^3$  /mL to  $4 \times 10^4$  /mL. The  
383 cells were incubated at 30°C for 12 to 48 hours. Cell cultures were not saturated before  
384 preparation.

385

### 386 **Yeast bud scar staining**

387 Cultured yeasts were fixed using 3.7% formaldehyde at 30°C for 30 minutes.  $1 \times 10^7$  cells  
388 were resuspended in 200  $\mu$ L distilled water and were stained with 0.1mg/mL Fluorescent  
389 Brightener 28 (Sigma) at 30°C for 30 minutes. Stained cells were washed twice with 200 $\mu$ L  
390 water and were then resuspended in 50  $\mu$ L water for imaging. The 10  $\mu$ L of suspended cells  
391 were used for imaging with DAPI filter using fluorescent microscopy.

392

### 393 **Preparation of yeast whole cell extracts**

394 Yeast whole cell extracts were prepared as previously described with minor modifications  
395 (Li et al., 2015). 5 OD cells were taken from 10 to 15 mL cultures. Harvested cell pellets  
396 were transferred to 1.7 mL Eppendorf tubes and washed once with 1 mL distilled water.  
397 Cell pellets were resuspended in 250  $\mu$ L of 2M NaOH with 8%  $\beta$ -Mercaptoethanol and  
398 incubated on ice for 5 minutes. Cells were pelleted and washed once with 250  $\mu$ L TAP  
399 extraction buffer (40 mM HEPES pH 7.5, 10% Glycerol, 350 mM NaCl, 0.1% Tween-20,  
400 phosphatase inhibitor cocktail from Roche, and proteinase inhibitor cocktail from Roche).  
401 Pelleted cells were resuspended in 180  $\mu$ L 2X SDS sample buffer and boiled at 100°C for 5  
402 minutes. 10  $\mu$ L of each sample was used per lane for Western blotting.

403

### 404 **Chronological life span (CLS) assay**

405 Chronological life span assay was performed as suggested previously with minor  
406 modifications (Longo et al., 2012). Saturated cultures in SDC media were diluted into fresh  
407 unbuffered SDC media or SDC media buffered at pH 6.0 by citrate-phosphate buffer  
408 (Burtner et al., 2009). Cultures were incubated at 30°C with 220 rpm shaking for aeration.  
409 At indicated times, same number of cells, based on optical density, were taken and plated  
410 into fresh YPD plate. The grown colony numbers were counted 2 days after the plating.  
411 Colony Forming Units (CFUs) were calculated by dividing the number of colonies grown  
412 at each time point by the number of colonies at day 3 (set as 100%).

413

414

## 415 **Chromatin IP**

416 Chromatin IP assays were performed as previously described with minor modifications  
417 (Shim et al., 2012). 100 mL cultures were subjected to crosslinking by addition of 3 mL of  
418 37% formaldehyde (Sigma) at RT for 15 minutes with constant swirling. 6mL of 2.5M  
419 glycine was added to quench crosslinking reaction at RT for 5 minutes. 80 OD quenched  
420 cells were pelleted by centrifugation at 6000 rpm for 5minutes and were washed twice with  
421 ice-cold 1X TBS (20 mM Tris pH 7.5 and 150 mM NaCl). Cells were lysed by bead  
422 beating in lysis buffer (50 mM HEPES pH 7.5, 150 mM NaCl, 1 mM EDTA, 1% Triton X-  
423 100, 0.1% Sodium deoxycholate, and 0.2% SDS). Lysates were sonicated to generate short  
424 DNA fragments using a Sonic Dismembrator Model 500 (Fisher) and were then clarified by  
425 centrifugation at 12000 rpm, 4°C for 20 minutes. Clarified lysates were diluted in four  
426 times volume of lysis buffer without SDS containing fresh Complete Mini protease  
427 inhibitor cocktail (Roche) and were then subjected to immunoprecipitation with antibodies  
428 against 4 $\mu$ L of H3pT11 (ab5168, Abcam) or 2 $\mu$ L of H3 (ab1719, Abcam). Antibody bound  
429 DNAs were recovered by incubation with 40  $\mu$ L protein A agarose beads (GE Healthcare)  
430 at 4°C for overnight. Beads were washed sequentially with following buffers: once with  
431 lysis buffer without SDS for 10 minutes, twice with 500mM NaCl lysis buffer without SDS  
432 for 10minutes, once with LiCl buffer (10 mM Tris-HCl pH 8.0, 250 mM LiCl, 1 mM  
433 EDTA, 0.5% NP-40, and 0.5% Sodium deoxycholate) for 10minutes, and twice with TE  
434 buffer (10 mM Tris-Cl pH 7.5 and 1 mM EDTA) for 5minutes. The DNA/chromatin  
435 complexes were then eluted twice by incubation in elution buffer (1% SDS and 250 mM  
436 NaCl) at 65°C for 30 minutes with occasional vortexing. Elutes were treated with

437 Proteinase K (Sigma) at 55°C for 2 hours and were then incubated at 65°C for overnight to  
438 reverse crosslinking. DNAs were prepared by phenol/chloroform extraction followed by  
439 ethanol precipitation. Precipitated DNAs were used for RT-qPCR or making libraries for  
440 ChIP-Sequencing.

441

#### 442 **RNA purification**

443 Yeast RNAs were prepared as previously described (Schmitt, Brown, & Trumpower,  
444 1990). Briefly, 5 OD yeast cells were taken from cultures and were washed once with 1 mL  
445 of DEPC treated water. Washed pellets were transferred into 1.7 mL Eppendorf tubes and  
446 resuspended in 400 µL of AE buffer (50 mM sodium acetate pH5.3 and 10 mM EDTA). 40  
447 µL of 10% SDS was added to AE buffer resuspended cells and vortexed. 440 µL of phenol  
448 pH 8.0 (Sigma) was added to tubes, and then tubes were incubated at 65°C for 4 minutes.  
449 Tubes were rapidly cooled down in pre-chilled ice block until phenol crystals appear and  
450 were then centrifuged at 11000 rpm for 2minutes. Aqueous phase was carefully transferred  
451 into new tubes. RNAs in the aqueous phase were prepared using phenol/chloroform  
452 extraction followed by ethanol precipitation.

453

#### 454 **TAP purification**

455 TAP purification for CK2 complex was carried out as previously described (Li et al.,  
456 2015). 6L cultures of Cka1-TAP strain were grown in YPD medium at 30°C to an OD  
457 about 2.0 at 600 nm. The cell pellets were resuspended in TAP extraction buffer (40 mM  
458 HEPES pH 7.5, 10% Glycerol, 350 mM NaCl, 0.1% Tween-20, and protease inhibitor

459 cocktail from Roche) and were then disrupted by bead beating. The crude cell extracts were  
460 treated with 125 U Benzonase and 50  $\mu$ L of 10 mg/ml heparin at RT for 15 minutes to  
461 remove nucleic acid contamination and were then clarified by ultracentrifugation. Clarified  
462 extracts were incubated with IgG Sepharose (GE healthcare) beads at 4°C for 3 hours. The  
463 IgG-beads bound proteins were resuspended in TEV cleavage buffer (10 mM Tris pH 8.0,  
464 150 mM NaCl, 0.1% NP-40, 0.5 mM EDTA, 10% glycerol, and Complete Mini protease  
465 inhibitor cocktail from Roche) and cleaved by addition of 5  $\mu$ L of AcTEV (Invitrogen) at  
466 4°C for overnight. The cleaved proteins were resuspended in calmodulin binding buffer (10  
467 mM Tris pH 8.0, 300 mM NaCl, 1 mM magnesium acetate, 1 mM imidazole, 2 mM CaCl<sub>2</sub>,  
468 0.1% NP-40, and 10% glycerol) and incubated with Calmodulin Sepharose (GE healthcare)  
469 beads at 4°C for 4 hours. Calmodulin-resin bound proteins were eluted by resuspension  
470 with calmodulin elution buffer (10 mM Tris pH 8.0, 150 mM NaCl, 1 mM magnesium  
471 acetate, 1 mM imidazole, 2 mM EGTA, 0.1% NP-40, 10% glycerol, and Complete Mini  
472 protease inhibitor cocktail from Roche).

473

#### 474 **In vitro kinase assay**

475 10  $\mu$ L of TAP purified CK2 complex or Sch9 were incubated with 800 ng of recombinant  
476 Xenopus histone H3 with or without addition of 10 mM ATP in NEBuffer for protein  
477 kinase (NEB) at 30°C for 1 to 3 hours. The reactions were quenched by addition of SDS  
478 sample buffer and boiled at 100°C for 5 minutes.

479

480 **Spotting assay for acetic acid resistance**

481 Overnight yeast cultures were diluted and were grown until their optical densities at 600  
482 nm reach at mid-log phase. The cultures were treated with 200-300 mM acetic acid for 160-  
483 180 minutes. After the treatment, 4 folds serially diluted cells were spotted onto YPD  
484 plates. Plates were incubated at 30°C for 1 to 2 days for taking pictures.

485

486 **Media glucose and acetate quantification**

487 Aliquots of yeast cultures were pelleted at indicated times, then supernatants were  
488 collected and frozen at -80°C until used. Glucose, and acetate concentrations in the growth  
489 medium were measured using enzymatic assay kits (EIAGLUC from ThermoFisher  
490 Scientific for glucose, and MAK086 from Sigma for acetate detection.) following  
491 manufacturer's protocols.

492

493 **ChIP-sequencing and RNA-sequencing**

494 ChIP-seq samples were sequenced in two lanes of an Illumina HiSeq 2500 at 51 bases,  
495 single end. Data was converted to fastq and demultiplexed using bcl2fastq. Reads were  
496 aligned to UCSC genome sacCer3 using bowtie2 (2.2.0) with option “-k 1”. Downstream  
497 analysis was done in R (3.2.2). Peaks were called using a custom perl script, requiring a 2-  
498 fold change between ip and input samples extending for 50 bases. Peaks closer than 400  
499 bases were merged. Differential peaks of H3pT11 between glucose and glycerol were  
500 called using R package DiffBind (2.0.9). Genes closest to differential peaks were identified  
501 using bedtools closest (2.26.0) to identify the closest transcription start site. After removing

502 any Pol III, tRNA, and rRNA genes, 366 peaks were found up in glycerol versus glucose,  
503 and 139 peaks were down in glycerol versus glucose. Gene ontology enrichment was  
504 performed using a hypergeometric test in R. Terms shown in the barplot had p-value < .05.  
505 The length of the bar represents the fold enrichment of the term's frequency in the list given  
506 the frequency of the term in the genome. Metagene plots were generated in R using 101-  
507 base mean-smoothed windows +/- 2000 bases around the TSS or +/- 500 bases around the  
508 transcript region (start to end). Different length genes were accommodated using the  
509 approx() function, which uses linear interpolation to define the approximated data points.  
510 After getting approximated values for each gene, the mean value at each position was used  
511 to generate the plot.

512 RNA-seq samples were sequenced in two lanes of an Illumina HiSeq 2500 at 51  
513 bases, single end. Data was converted to fastq and demultiplexed using bcl2fastq. Reads  
514 were aligned to UCSC genome sacCer3 with annotation from Ensembl 84 using tophat  
515 (2.0.13) with "-x 1 -g 1". Reads were counted on genes (unioned exon space) using  
516 bedtools coverage (2.26.0). Data was read into R (3.2.2). Differentially expressed genes  
517 were found using R package edgeR (3.14.0) and required to have BH-adjusted p-value <  
518 .05 and two-fold change in order to be called differentially expressed. All correlations  
519 shown were calculated using cor () function in R, which is Pearson correlation by default.  
520 Lists of genes for the cyto/mito boxplot were taken from previous work (Cheng et al.,  
521 2007).

522

523



524 **References**

525

526 Ahmed, K., Gerber, D. A., & Cochet, C. (2002). Joining the cell survival squad: an  
527 emerging role for protein kinase CK2. *Trends Cell Biol*, 12(5), 226-230.

528 Basnet, H., Su, X. B., Tan, Y., Meisenhelder, J., Merkurjev, D., Ohgi, K. A., . . . Rosenfeld,  
529 M. G. (2014). Tyrosine phosphorylation of histone H2A by CK2 regulates  
530 transcriptional elongation. *Nature*, 516(7530), 267-271.

531 Benayoun, B. A., Pollina, E. A., & Brunet, A. (2015). Epigenetic regulation of ageing:  
532 linking environmental inputs to genomic stability. *Nature reviews Molecular cell*  
533 *biology*, 16(10), 593-610.

534 Boles, E., Schulte, F., Miosga, T., Freidel, K., Schluter, E., Zimmermann, F. K., . . .  
535 Heinisch, J. J. (1997). Characterization of a glucose-repressed pyruvate kinase  
536 (Pyk2p) in *Saccharomyces cerevisiae* that is catalytically insensitive to fructose-1,6-  
537 bisphosphate. *Journal of Bacteriology*, 179(9), 2987-2993.

538 Borgo, C., Milan, G., Favaretto, F., Stasi, F., Fabris, R., Salizzato, V., . . . Foletto, M.  
539 (2017). CK2 modulates adipocyte insulin-signaling and is up-regulated in human  
540 obesity. *Scientific Reports*, 7(1), 17569.

541 Broach, J. R. (2012). Nutritional control of growth and development in yeast. *Genetics*,  
542 192(1), 73-105.

543 Burtner, C. R., Murakami, C. J., Kennedy, B. K., & Kaerberlein, M. (2009). A molecular  
544 mechanism of chronological aging in yeast. *Cell cycle*, 8(8), 1256-1270.

- 545 Chen-Wu, J., Padmanabha, R., & Glover, C. (1988). Isolation, sequencing, and disruption  
546 of the CKA1 gene encoding the alpha subunit of yeast casein kinase II. *Molecular*  
547 *and Cellular Biology*, 8(11), 4981-4990.
- 548 Cheng, C., Fabrizio, P., Ge, H., Wei, M., Longo, V. D., & Li, L. M. (2007). Significant and  
549 systematic expression differentiation in long-lived yeast strains. *PLoS One*, 2(10),  
550 e1095. doi:10.1371/journal.pone.0001095
- 551 Cheung, W. L., Turner, F. B., Krishnamoorthy, T., Wolner, B., Ahn, S.-H., Foley, M., . . .  
552 Allis, C. D. (2005). Phosphorylation of histone H4 serine 1 during DNA damage  
553 requires casein kinase II in *S. cerevisiae*. *Current biology*, 15(7), 656-660.
- 554 Clements, A., Poux, A. N., Lo, W.-S., Pillus, L., Berger, S. L., & Marmorstein, R. (2003).  
555 Structural basis for histone and phosphohistone binding by the GCN5 histone  
556 acetyltransferase. *Molecular cell*, 12(2), 461-473.
- 557 Dang, W., Steffen, K. K., Perry, R., Dorsey, J. A., Johnson, F. B., Shilatifard, A., . . .  
558 Berger, S. L. (2009). Histone H4 lysine 16 acetylation regulates cellular lifespan.  
559 *Nature*, 459(7248), 802-807. doi:10.1038/nature08085
- 560 Dang, W., Sutphin, G. L., Dorsey, J. A., Otte, G. L., Cao, K., Perry, R. M., . . . Tsuchiyama,  
561 S. (2014). Inactivation of yeast Isw2 chromatin remodeling enzyme mimics  
562 longevity effect of calorie restriction via induction of genotoxic stress response. *Cell*  
563 *metabolism*, 19(6), 952-966.
- 564 DeRisi, J. L., Iyer, V. R., & Brown, P. O. (1997). Exploring the metabolic and genetic  
565 control of gene expression on a genomic scale. *Science*, 278(5338), 680-686.

- 566 Di Maira, G., Salvi, M., Arrigoni, G., Marin, O., Sarno, S., Brustolon, F., . . . Ruzzene, M.  
567 (2005). Protein kinase CK2 phosphorylates and upregulates Akt/PKB. *Cell Death &*  
568 *Differentiation*, 12(6), 668-677.
- 569 Fabrizio, P., Gattazzo, C., Battistella, L., Wei, M., Cheng, C., McGrew, K., & Longo, V. D.  
570 (2005). Sir2 blocks extreme life-span extension. *Cell*, 123(4), 655-667.
- 571 Fabrizio, P., Hoon, S., Shamalnasab, M., Galbani, A., Wei, M., Giaever, G., . . . Longo, V.  
572 D. (2010). Genome-wide screen in *Saccharomyces cerevisiae* identifies vacuolar  
573 protein sorting, autophagy, biosynthetic, and tRNA methylation genes involved in  
574 life span regulation. *PLoS Genet*, 6(7), e1001024.
- 575 Fabrizio, P., Pozza, F., Pletcher, S. D., Gendron, C. M., & Longo, V. D. (2001). Regulation  
576 of longevity and stress resistance by Sch9 in yeast. *Science*, 292(5515), 288-290.
- 577 Fasolo, J., Sboner, A., Sun, M. G., Yu, H., Chen, R., Sharon, D., . . . Snyder, M. (2011).  
578 Diverse protein kinase interactions identified by protein microarrays reveal novel  
579 connections between cellular processes. *Genes & development*, 25(7), 767-778.
- 580 Feser, J., Truong, D., Das, C., Carson, J. J., Kieft, J., Harkness, T., & Tyler, J. K. (2010).  
581 Elevated histone expression promotes life span extension. *Molecular cell*, 39(5),  
582 724-735.
- 583 Franchin, C., Borgo, C., Zaramella, S., Cesaro, L., Arrigoni, G., Salvi, M., & Pinna, L. A.  
584 (2017). Exploring the CK2 Paradox: Restless, Dangerous, Dispensable.  
585 *Pharmaceuticals*, 10(1), 11.

- 586 Galdieri, L., Mehrotra, S., Yu, S., & Vancura, A. (2010). Transcriptional regulation in yeast  
587 during diauxic shift and stationary phase. *OmicS: a journal of integrative biology*,  
588 *14*(6), 629-638.
- 589 Galdieri, L., Zhang, T., Rogerson, D., & Vancura, A. (2016). Reduced histone expression  
590 or a defect in chromatin assembly induces respiration. *Molecular and Cellular*  
591 *Biology*, *36*(7), 1064-1077.
- 592 Govin, J., Dorsey, J., Gaucher, J., Rousseaux, S., Khochbin, S., & Berger, S. L. (2010).  
593 Systematic screen reveals new functional dynamics of histones H3 and H4 during  
594 gametogenesis. *Genes & development*, *24*(16), 1772-1786.
- 595 Graczyk, D., Dębski, J., Muszyńska, G., Bretner, M., Lefebvre, O., & Boguta, M. (2011).  
596 Casein kinase II-mediated phosphorylation of general repressor Maf1 triggers RNA  
597 polymerase III activation. *Proceedings of the National Academy of Sciences*,  
598 *108*(12), 4926-4931.
- 599 Guarente, L. (2006). Sirtuins as potential targets for metabolic syndrome. *Nature*,  
600 *444*(7121), 868-874.
- 601 Hu, Z., Chen, K., Xia, Z., Chavez, M., Pal, S., Seol, J.-H., . . . Tyler, J. K. (2014).  
602 Nucleosome loss leads to global transcriptional up-regulation and genomic  
603 instability during yeast aging. *Genes & development*, *28*(4), 396-408.
- 604 Kniewel, R., Murakami, H., Liu, Y., Ito, M., Ohta, K., Hollingsworth, N. M., & Keeney, S.  
605 (2017). Histone H3 threonine 11 phosphorylation is catalyzed directly by the  
606 meiosis-specific kinase Mek1 and provides a molecular readout of Mek1 activity in  
607 vivo. *Genetics*, genetics. 300359.302017.

- 608 Lee, J., Moir, R. D., & Willis, I. M. (2009). Regulation of RNA polymerase III  
609 transcription involves SCH9-dependent and SCH9-independent branches of the  
610 target of rapamycin (TOR) pathway. *Journal of Biological Chemistry*, 284(19),  
611 12604-12608.
- 612 Lee, J., Moir, R. D., & Willis, I. M. (2015). Differential phosphorylation of RNA  
613 polymerase III and the initiation factor TFIIB in *Saccharomyces cerevisiae*. *PLoS*  
614 *One*, 10(5), e0127225.
- 615 Li, S., Swanson, S. K., Gogol, M., Florens, L., Washburn, M. P., Workman, J. L., &  
616 Suganuma, T. (2015). Serine and SAM responsive complex SESAME regulates  
617 histone modification crosstalk by sensing cellular metabolism. *Molecular cell*,  
618 60(3), 408-421.
- 619 Lindstrom, D. L., & Gottschling, D. E. (2009). The mother enrichment program: a genetic  
620 system for facile replicative life span analysis in *Saccharomyces cerevisiae*.  
621 *Genetics*, 183(2), 413-422, 411SI-413SI. doi:10.1534/genetics.109.106229
- 622 Lindstrom, D. L., & Gottschling, D. E. (2009). The mother enrichment program: a genetic  
623 system for facile replicative life span analysis in *Saccharomyces cerevisiae*.  
624 *Genetics*, 183(2), 413-422.
- 625 Litchfield, D. W. (2003). Protein kinase CK2: structure, regulation and role in cellular  
626 decisions of life and death. *Biochemical Journal*, 369(1), 1-15.
- 627 Lodi, T., Alberti, A., Guiard, B., & Ferrero, I. (1999). Regulation of the *Saccharomyces*  
628 *cerevisiae* DLD1 gene encoding the mitochondrial protein D-lactate

- 629 ferricytochrome c oxidoreductase by HAP1 and HAP2/3/4/5. *Molecular and*  
630 *General Genetics MGG*, 262(4), 623-632.
- 631 Longo, V. D. (1999). Mutations in signal transduction proteins increase stress resistance  
632 and longevity in yeast, nematodes, fruit flies, and mammalian neuronal cells.  
633 *Neurobiology of aging*, 20(5), 479-486.
- 634 Longo, V. D., Shadel, G. S., Kaeberlein, M., & Kennedy, B. (2012). Replicative and  
635 chronological aging in *Saccharomyces cerevisiae*. *Cell metabolism*, 16(1), 18-31.
- 636 Metzger, E., Yin, N., Wissmann, M., Kunowska, N., Fischer, K., Friedrichs, N., . . .  
637 Scheidtmann, K.-H. (2008). Phosphorylation of histone H3 at threonine 11  
638 establishes a novel chromatin mark for transcriptional regulation. *nature cell*  
639 *biology*, 10(1), 53-60.
- 640 Mitchell, B. S. (2013). Akt activation enhances ribosomal RNA synthesis through casein  
641 kinase II and TIF-IA. *Proceedings of the National Academy of Sciences*, 110(51),  
642 20681-20686.
- 643 Nakanishi, S., Sanderson, B. W., Delventhal, K. M., Bradford, W. D., Staehling-Hampton,  
644 K., & Shilatifard, A. (2008). A comprehensive library of histone mutants identifies  
645 nucleosomal residues required for H3K4 methylation. *Nature structural &*  
646 *molecular biology*, 15(8), 881-888.
- 647 O'sullivan, R. J., Kubicek, S., Schreiber, S. L., & Karlseder, J. (2010). Reduced histone  
648 biosynthesis and chromatin changes arising from a damage signal at telomeres.  
649 *Nature structural & molecular biology*, 17(10), 1218-1225.

- 650 Orlandi, I., Ronzulli, R., Casatta, N., & Vai, M. (2013). Ethanol and acetate acting as  
651 carbon/energy sources negatively affect yeast chronological aging. *Oxidative*  
652 *medicine and cellular longevity*, 2013.
- 653 Padmanabha, R., Chen-Wu, J., Hanna, D., & Glover, C. (1990). Isolation, sequencing, and  
654 disruption of the yeast CKA2 gene: casein kinase II is essential for viability in  
655 *Saccharomyces cerevisiae*. *Molecular and Cellular Biology*, 10(8), 4089-4099.
- 656 Panasyuk, G., Nemazanyy, I., Zhyvoloup, A., Bretner, M., Litchfield, D. W., Filonenko, V.,  
657 & Gout, I. T. (2006). Nuclear export of S6K1 II is regulated by protein kinase CK2  
658 phosphorylation at Ser-17. *Journal of Biological Chemistry*, 281(42), 31188-31201.
- 659 Powers, R. W., 3rd, Kaerberlein, M., Caldwell, S. D., Kennedy, B. K., & Fields, S. (2006).  
660 Extension of chronological life span in yeast by decreased TOR pathway signaling.  
661 *Genes Dev*, 20(2), 174-184. doi:10.1101/gad.1381406
- 662 Rodriguez, A., De La Cera, T., Herrero, P., & Moreno, F. (2001). The hexokinase 2 protein  
663 regulates the expression of the GLK1, HXK1 and HXK2 genes of *Saccharomyces*  
664 *cerevisiae*. *Biochem J*, 355(Pt 3), 625-631.
- 665 Schmitt, M. E., Brown, T. A., & Trumpower, B. L. (1990). A rapid and simple method for  
666 preparation of RNA from *Saccharomyces cerevisiae*. *Nucleic acids research*,  
667 18(10), 3091.
- 668 Sen, P., Shah, P. P., Nativio, R., & Berger, S. L. (2016). Epigenetic mechanisms of  
669 longevity and aging. *Cell*, 166(4), 822-839.

- 670 Shim, Y. S., Choi, Y., Kang, K., Cho, K., Oh, S., Lee, J., . . . Lee, D. (2012). Hrp3 controls  
671 nucleosome positioning to suppress non-coding transcription in eu- and  
672 heterochromatin. *The EMBO journal*, *31*(23), 4375-4387.
- 673 Shimada, M., Niida, H., Zineldeen, D. H., Tagami, H., Tanaka, M., Saito, H., & Nakanishi,  
674 M. (2008). Chk1 is a histone H3 threonine 11 kinase that regulates DNA damage-  
675 induced transcriptional repression. *Cell*, *132*(2), 221-232.
- 676 Sousa, M., Ludovico, P., Rodrigues, F., Leão, C., & Côrte-Real, M. (2012). Stress and cell  
677 death in yeast induced by acetic acid. In *Cell Metabolism-Cell Homeostasis and*  
678 *Stress Response*: InTech.
- 679 Vander Heiden, M. G., Cantley, L. C., & Thompson, C. B. (2009). Understanding the  
680 Warburg effect: the metabolic requirements of cell proliferation. *Science*,  
681 *324*(5930), 1029-1033.
- 682 Wei, M., Fabrizio, P., Hu, J., Ge, H., Cheng, C., Li, L., & Longo, V. D. (2008). Life span  
683 extension by calorie restriction depends on Rim15 and transcription factors  
684 downstream of Ras/PKA, Tor, and Sch9. *PLoS Genet*, *4*(1), e13.
- 685 Wierman, M. B., Maqani, N., Strickler, E., Li, M., & Smith, J. S. (2017). Caloric  
686 Restriction Extends Yeast Chronological Life Span by Optimizing the Snf1  
687 (AMPK) Signaling Pathway. *Molecular and Cellular Biology*, *37*(13), e00562-  
688 00516.
- 689 Wilson, W. A., & Roach, P. J. (2002). Nutrient-regulated protein kinases in budding yeast.  
690 *Cell*, *111*(2), 155-158.



691 Yang, W., Xia, Y., Hawke, D., Li, X., Liang, J., Xing, D., . . . Lu, Z. (2012). PKM2  
692 phosphorylates histone H3 and promotes gene transcription and tumorigenesis. *Cell*,  
693 *150*(4), 685-696.

694

695

## 696 **Figure Legends**

697

698 **Figure 1.** H3pT11 responds to nutritional stress.

699 (A and B) H3pT11 levels in different concentration of glucose (A) or non-fermentable  
700 glycerol (B) containing media conditions measured by Western blots. (C) The average  
701 profiles of H3pT11 at 366 genes, whose H3pT11 levels are increased in YPglycerol  
702 (Glycerol) compared to YPD (Glucose) condition. TSS, transcription start site; TES,  
703 transcription end site. (D) Normalized H3pT11 levels to H3 at *HXK1* and *DLD1* gene loci  
704 in YPD and YPglycerol conditions. (E) GO term analysis of the 366 genes shown in (C).

705

706 **Figure 1-figure supplement 1.** H3pT11 antibody validation.

707 (A) H3pT11 antibody specificity test against unmodified, H3pT11, and H3pS10 containing  
708 histone H3 amino acids (aa) 1-21 peptides measured by Western blots. (B) H3pT11 levels  
709 in WT (ySE40), H3T6A, H3S10A and H3T11A strains in YPD condition.

710

711 **Figure 1-figure supplement 2.** H3pT11 responds to low glucose condition.

712 (A) Western blots showing H3pT11 levels in WT (BY4741) cultures shifted from YPD to

713 YP media containing 2% glucose, 3% glycerol, or 2% glucose with 3% glycerol (Glucose +  
714 Glycerol) then incubated for 1 hour. For ‘Glucose added’ sample, WT cultures were  
715 initially shifted from YPD to YP with 3% glycerol for 1 hour, then 2% glucose was directly  
716 added to the culture, and further incubated for 1 hour. (B) A bar plot showing the total  
717 number of H3pT11 peaks in YPglycerol condition (Glycerol-1 and 2) and YPD condition  
718 (Glucose-1 and 2) ChIP-seq experiments. This bar plot does not include peaks overlapping  
719 non-pol II genes or peaks on the mitochondrial chromosome. (C) The average profiles of  
720 H3pT11 around the transcription start site (TSS) and across the gene body for 139 genes  
721 whose H3pT11 levels are decreased in YPglycerol (Glycerol) compared to YPD (Glucose)  
722 condition. tRNA and rRNA genes have been excluded. TES: transcription end site. (D) GO  
723 term analysis of the 139 genes from ChIP-sequencing data shown in Figure S2C. H3pT11  
724 levels are decreased at genes related in fermentation (in red) and translation (in blue).

725

726 **Figure 2.** H3pT11 regulates transcription involved in metabolic transition upon nutritional  
727 stress.

728 (A) The average H3pT11 signal of genes from different gene expression quantiles in  
729 YPglycerol. (B) A scatter plot from RNA-seq data showing a negative correlation between  
730 transcription changes upon media shift from YPD to YPglycerol (x-axis), and the changes  
731 in H3T11A mutant compared to WT in YPglycerol condition (y-axis). (C) Scatter plots  
732 from RNA-seq for transcripts of genes in indicated pathways. (D) Box-plots showing  
733 expression changes of cytoplasmic (cyto) and mitochondrial (mito) ribosomal genes upon  
734 nutritional stress condition (upper panel) and in H3T11A mutant in YPglycerol condition

735 (lower panel). Gly, YPglycerol condition; Glu, YPD condition.

736

737 **Figure 3.** Cka1 in the CK2 complex phosphorylates H3T11.

738 (A) (Left) H3pT11 levels of WT, *cka1Δ*, and *cka2Δ* in YPD condition analyzed by Western

739 blots. (Right) The relative band intensities of H3pT11 to H3 signals compared to WT. Error

740 bars represent standard deviation (STD) from three biological replicates (B) (Left)

741 Coomassie staining of TAP purified CK2 complex using Cka1-TAP strain. (Right) *In vitro*

742 kinase assay using TAP purified CK2 and recombinant H3 as a substrate. (C) *In vitro*

743 kinase assay of TAP purified CK2 using recombinant H3 WT or H3T11A mutant as a

744 substrate. (D) H3pT11 level changes in WT, *cka1Δ*, and *cka2Δ* mutants upon culture shift

745 to YPglycerol media.

746

747 **Figure 3-figure supplement 1.** SESAME is not responsible for increased H3pT11 in

748 nutritional stress condition.

749 (A) Western blots showing that H3pT11 level changes of WT and pyruvate kinase 1

750 temperature sensitive mutant *cdc19-1* upon media shift from YPD, at permitting

751 temperature (25°C) to YPglycerol, at non-permitting temperature (37°C). (B) H3pT11

752 levels in WT and SESAME subunit deletion mutants: *sam1Δ*, *shm2Δ*, and *ser33Δ* mutants

753 upon media shift to YPglycerol analyzed by Western blots.

754

755 **Figure 3-figure supplement 2.** Cka1 is required for H3pT11.

756 (A) H3pT11 levels in yeast kinase deletion mutants (*bub1Δ*, *cka1Δ*, and *cka2Δ*) and

757 mutants of candidates for H3pT11 kinase (*mek1Δ* and *chk1Δ*) cultured in YPD media  
758 examined by western blots. (B) H3pT11 levels in subunits of CK2 deletion mutants:  
759 catalytic subunits, *cka1Δ* and *cka2Δ*, and regulatory subunits, *ckb1Δ* and *ckb2Δ*, cultured in  
760 YPD media examined by western blots.

761

762 **Figure 4.** Sch9 regulates H3pT11 upon nutritional stress.

763 (A) H3pT11 level changes of WT, *sch9Δ*, *ras2Δ*, and *tor1Δ* mutants upon media shift to  
764 YPglycerol measured by Western blots. (B) *In vitro* kinase assay of TAP purified (Sch9-  
765 TAP) Sch9 and CK2 using recombinant H3 as a substrate. (C) (Left) H3pT11 levels in WT,  
766 *sch9Δ*, *cka1Δ*, and *sch9Δcka1Δ* at 1 hour after media shift from YPD to YPglycerol  
767 analyzed by Western blots (Right) The relative ratios of H3pT11 to H3 signals are  
768 presented with error bars indicating STD from three biological replicates.

769

770 **Figure 5.** Phosphorylation of H3T11 regulates lifespan.

771 (A) Chronological lifespan (CLS) assays of WT (ySE40) and H3T11A strains. (B) CLS  
772 assays of WT (BY4742) and *cka1Δ* strains. Error bars in CLS assays indicate STD from  
773 three to six biological replicates. CFU, colony forming units. (C) Relative viability of WT  
774 (BY4742), *sch9Δ*, *cka1Δ*, and *sch9Δcka1Δ* during CLS analysis at indicated time points. (D)  
775 H3pT11 levels measured at indicated times during CLS analysis of ySE40 (WT of histone  
776 mutant strains) and BY4741 strain analyzed by Western blots. (E) A Bar graph displaying  
777 media glucose concentration measured from the WT strain culture at indicated times in  
778 CLS analysis. Error bars indicate STD of three biological replicates. (F) H3pT11 levels of

779 WT strain at exponential growth stage (mid-log), saturated day 1 culture (day 1), and day 1  
780 culture with re-supplemented glucose (day 1 + glucose) analyzed by Western blots. For day  
781 1 + glucose culture, 2% glucose was directly added to saturated day 1 culture, then  
782 incubated for additional 1 hour.

783

784 **Figure 6.** H3pT11 affects lifespan by regulation of acetic acid resistance.

785 (A) Relative viability of H3T11A and *cka1Δ* mutants compared to their WT strains after  
786 exposure to indicated durations and concentrations of acetic acid. (B) Acetic acid resistance  
787 of WT, *sch9Δ*, *cka1Δ*, and *sch9Δcka1Δ*. (C) CLS assays of WT and H3T11A strains in  
788 buffered (pH 6.0) or unbuffered conditions. (D) H3pT11 levels in WT and *cka1Δ* upon  
789 50mM acetic acid addition analyzed by Western blots (upper). The relative band intensities  
790 of H3pT11 to H3 signals (lower). (E) H3pT11 levels in WT, *sch9Δ*, *cka1Δ*, and  
791 *sch9Δcka1Δ* at 2 hours after 50mM acetic acid treatment analyzed by Western blots (upper).  
792 The relative ratios of H3pT11 to H3 signals (lower). All error bars indicate STD from three  
793 biological replicates.

794

795 **Figure 6-figure supplement 1.** H3pT11 controls lifespan by regulation of acid stress  
796 response.

797 (A) Media pH in WT cultures during CLS analysis. (B) Media acetate concentration in WT  
798 cultures at indicated times. (C) CLS analysis of WT and *cka1Δ* strain cultured in SDC  
799 media buffered at pH 6.0. (D) Media glucose concentrations of WT strain cultures in SDC  
800 media (no acetic acid) or SDC media supplemented with 10mM or 50mM acetic acid.

801 Acetic acid treatment time was regarded as 0 hour. From (A) to (D), All error bars indicate  
802 standard deviation (STD) of three biological replicates. (E) H3pT11 levels in WT strain  
803 upon treatment of 10mM or 50mM acetic acid measured by Western blots.

804

805 **Figure 7.** H3pT11 increases in aged cells.

806 (A) Bud scar staining of MEP strain UCC8774 incubated with or without addition of 17 $\beta$ -  
807 estradiol. (B) (Left) H3pT11 levels of UCC8774 strain with or without addition of 17 $\beta$ -  
808 estradiol analyzed by Western blots. (bottom) The relative band intensities of H3pT11 to  
809 H3 signals from three biological replicates. Error bars represent STD. (C) Summary models  
810 of H3pT11 functions upon stress conditions.

811

812 **Figure 7-figure supplement 1.** Strain of Mother cell Enrichment Program (MEP) for  
813 isolation of aged cells.

814 (A) Schematic diagram of MEP strain. UCC8774 (Right) strain contains Cre-EBD78 gene  
815 construct governed by yeast Scw11 gene promoter (Scw11 pro), which is only active in  
816 recently budded daughter cells. UCC8774 strain also has loxP sequences surrounding exons  
817 of two yeast essential genes; UBC9 and CDC20, while UCC8650 strain (Left) does not.

818 Consequently, UCC8774 daughter cells cannot survive in the presence of 17 $\beta$ -estradiol by  
819 removal of UBC9 and CDC20 exons by Cre recombinase, but UCC8650 strain can survive.

820 (B) H3pT11 and H4K16ac levels of UCC8650 strain with or without addition of 17 $\beta$ -

821 estradiol measured by Western blots. UCC8650 daughter can survive in the presence of

822 17 $\beta$ -estradiol while expressing Cre-EBD78.

823

824 **Additional files**

825 Supplementary file 1 – Yeast strains used in this study

826

# Figure 1

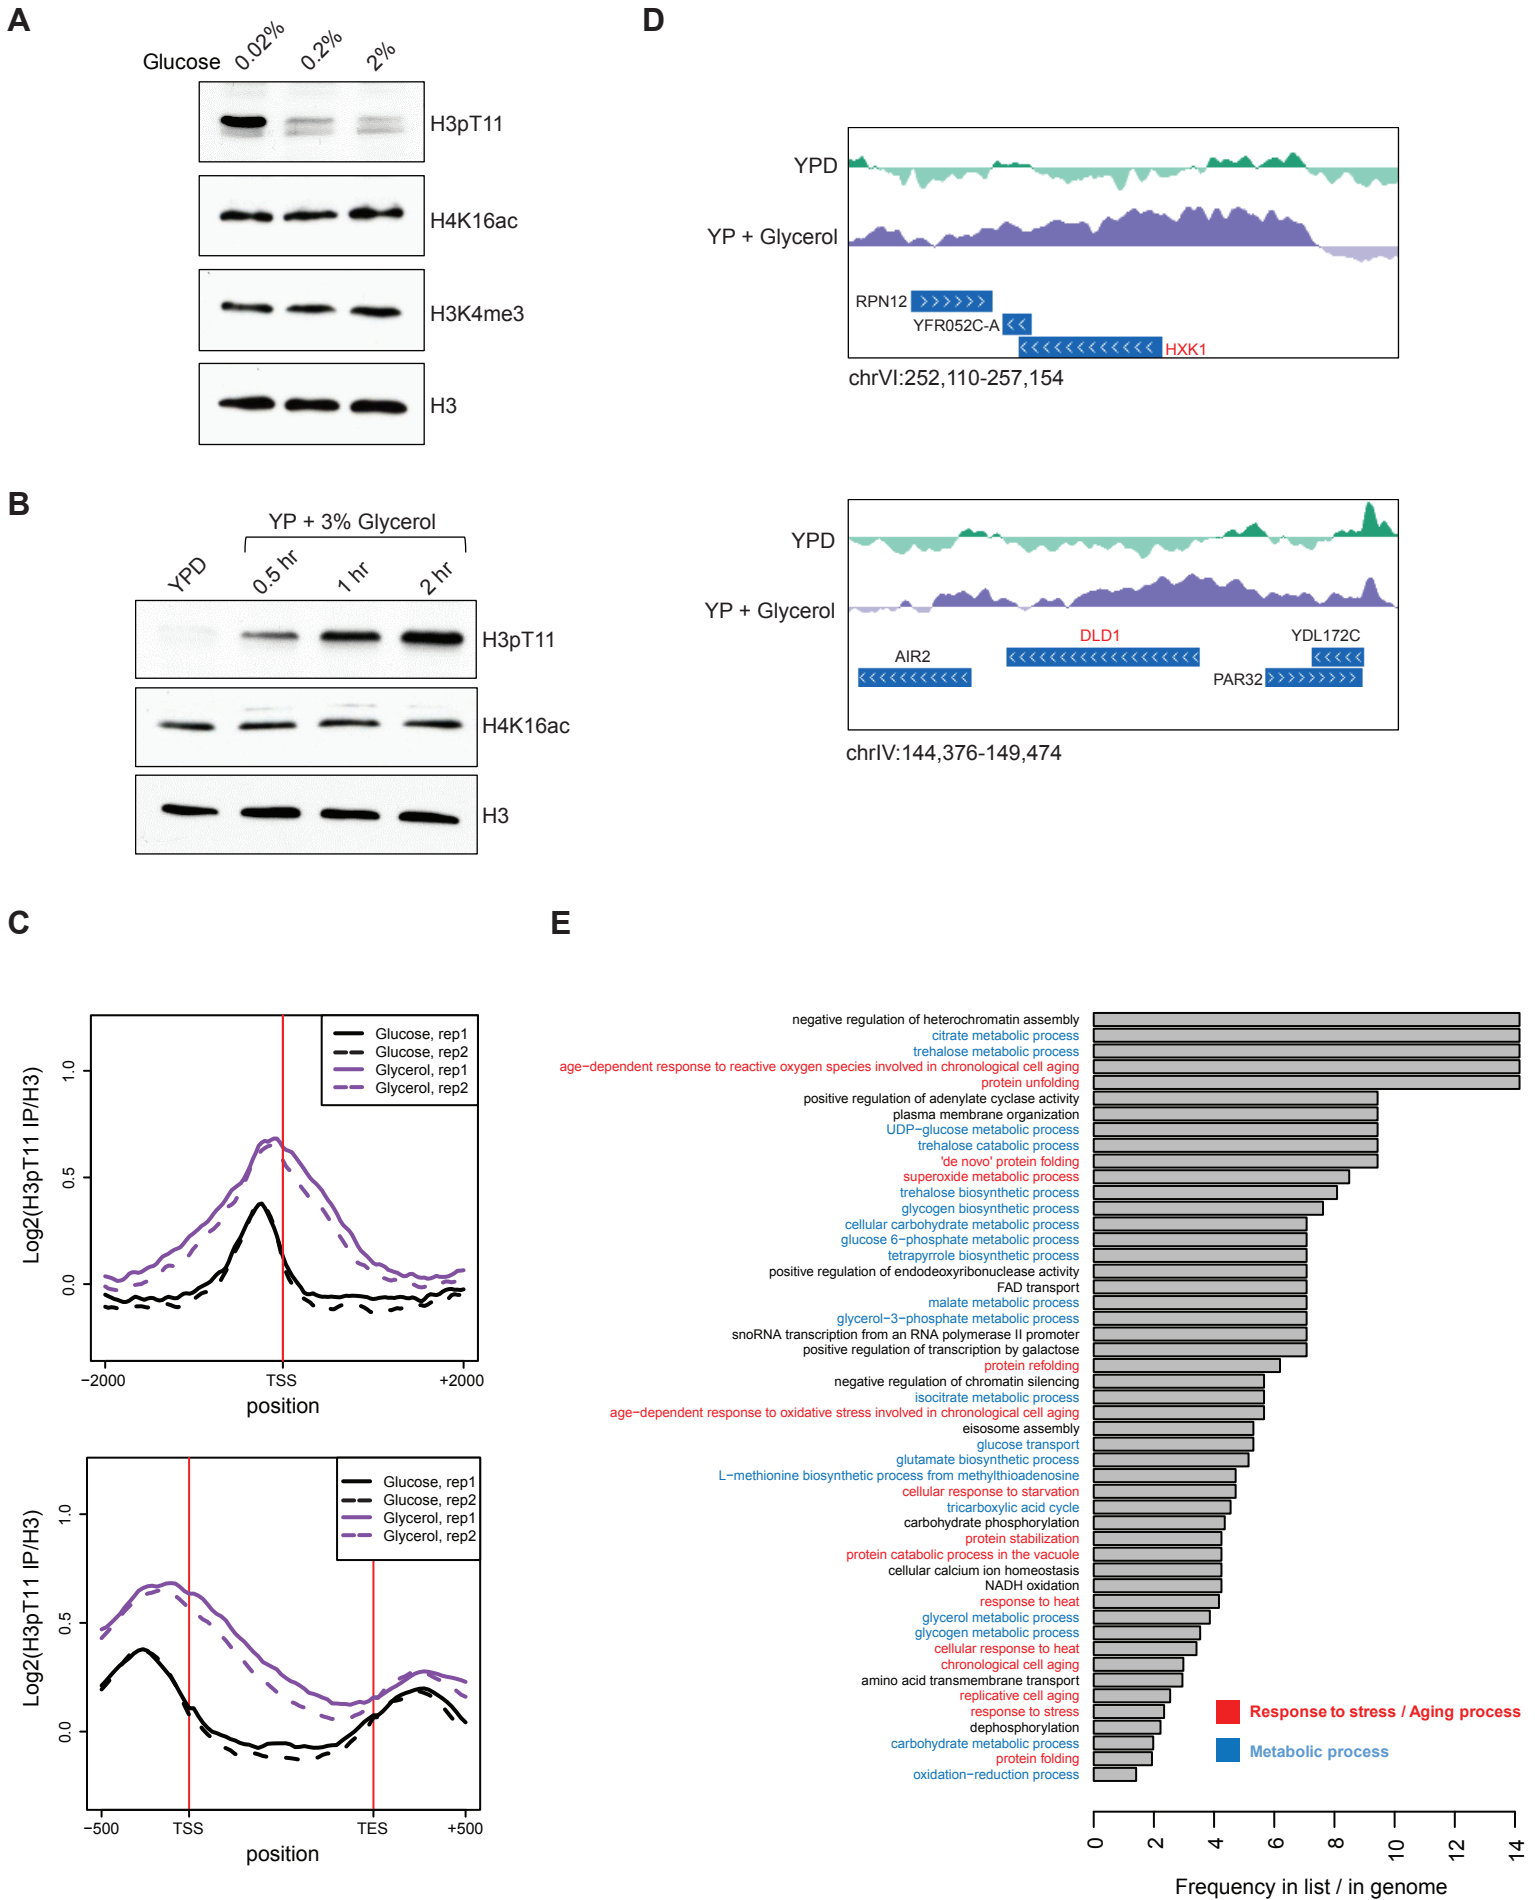



# Figure 1- figure supplement 1

**A**

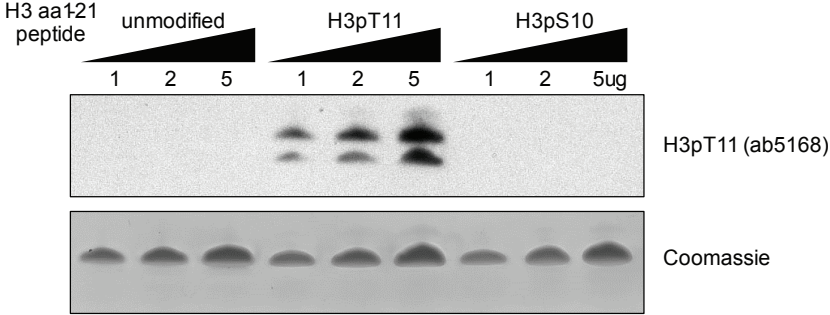

**B**

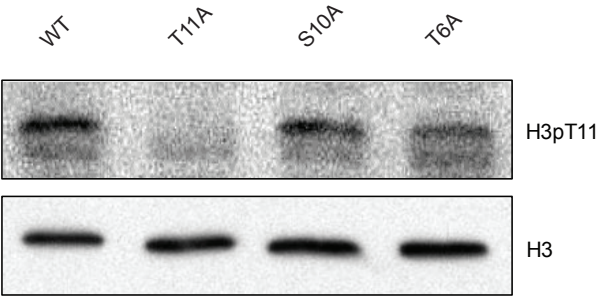

## Figure 1- figure supplement 2

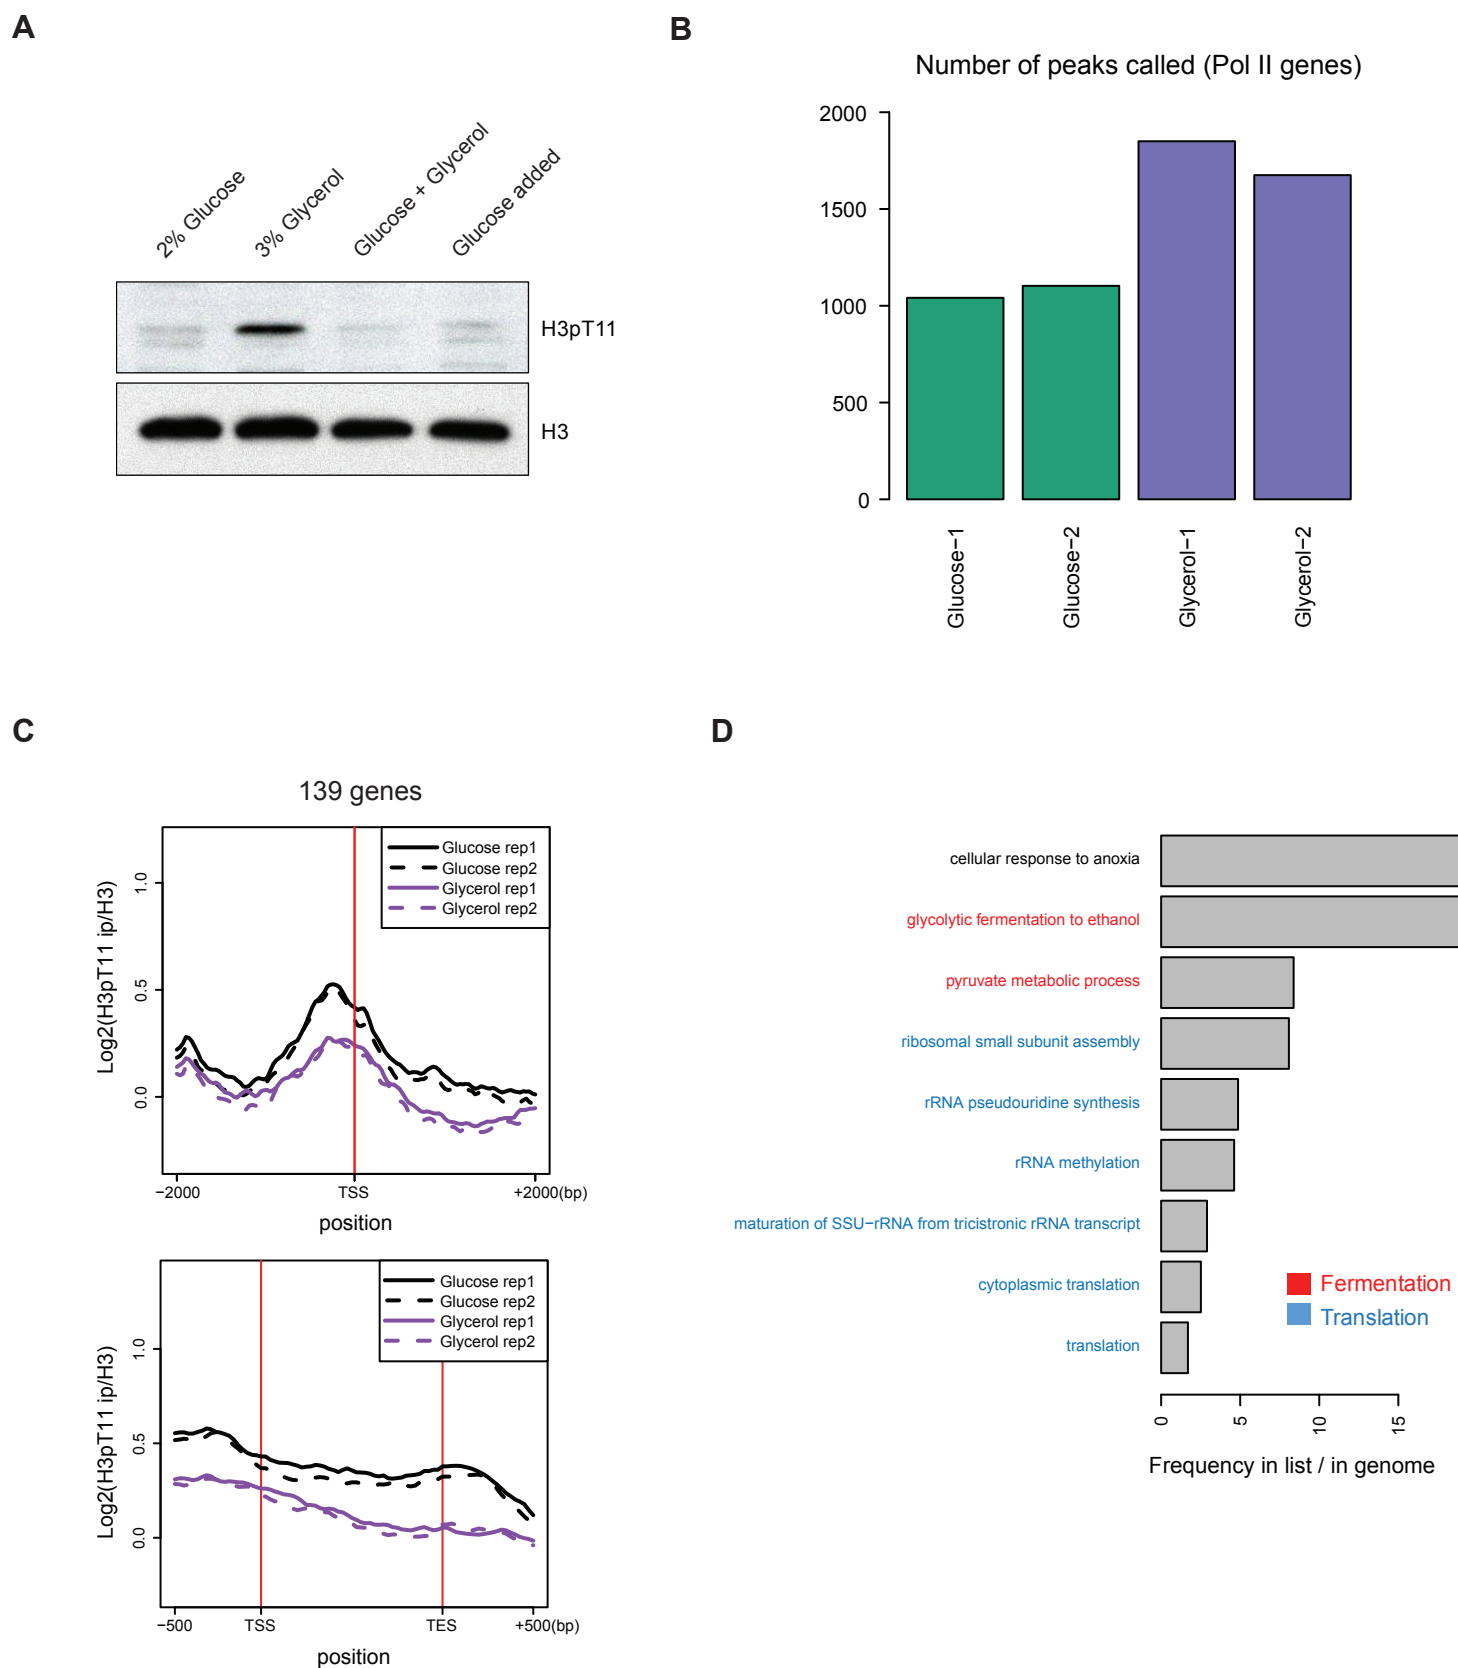

## Figure 2

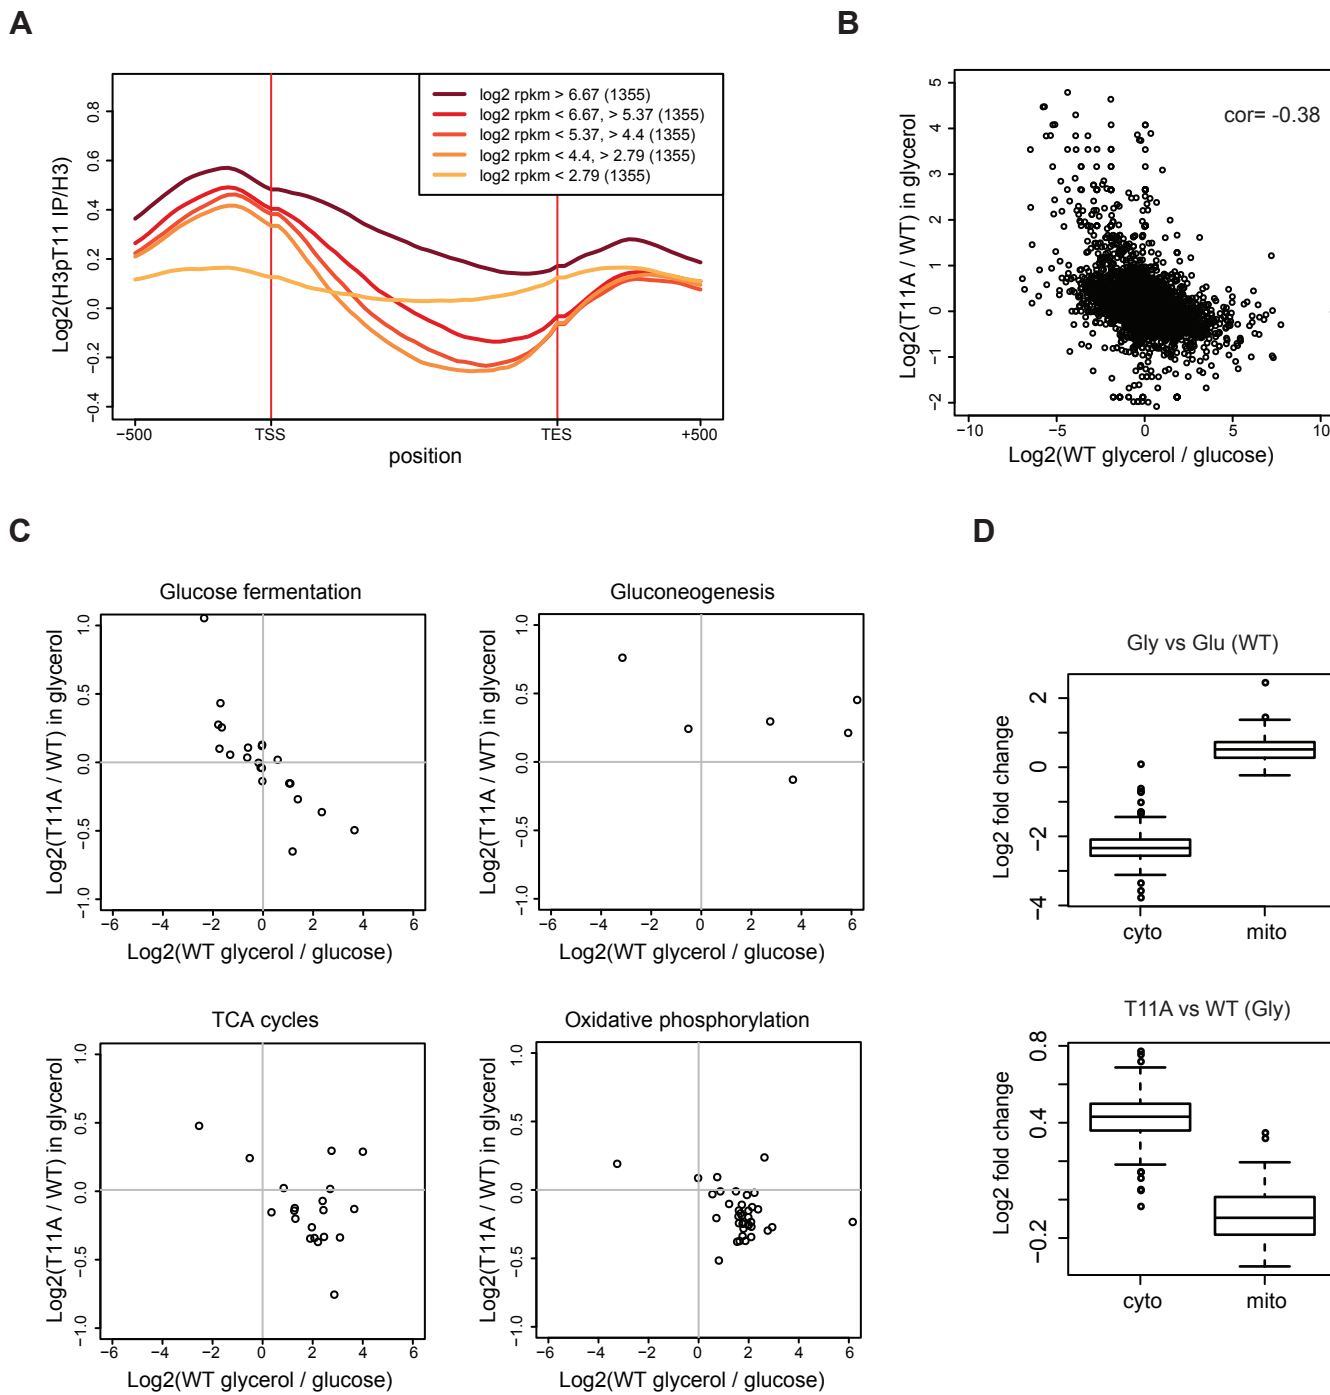

**Figure 3****A**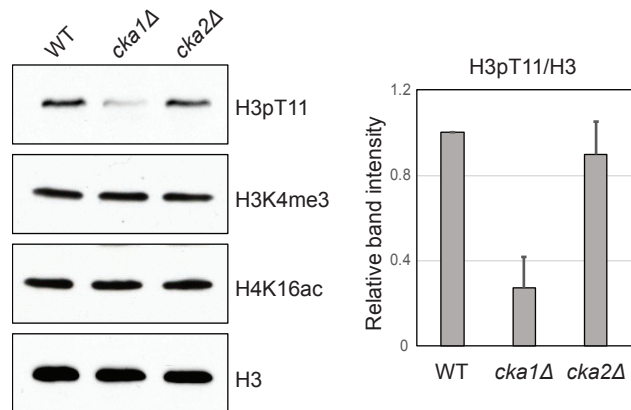**B**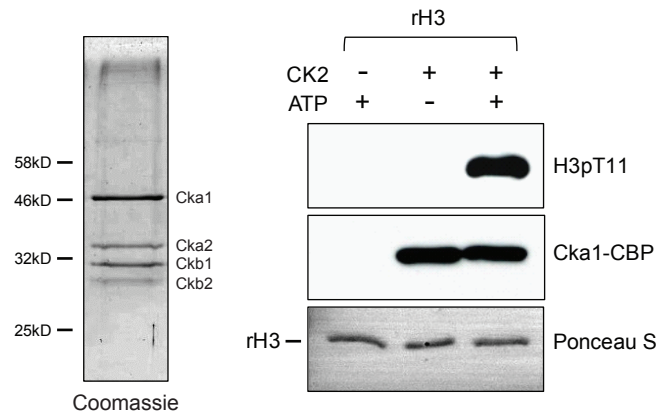**C**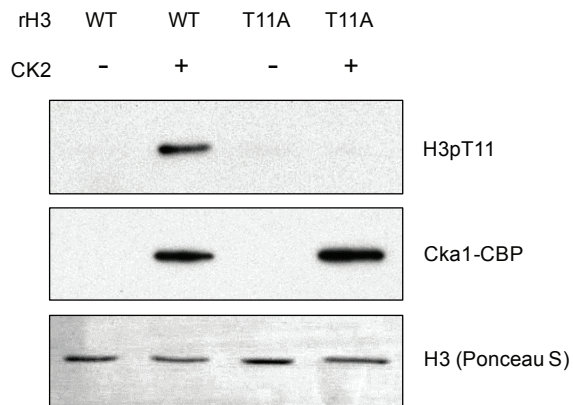**D**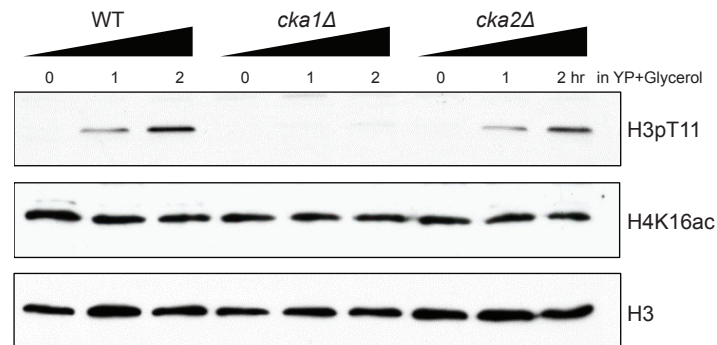

Figure 3- figure supplement 1

**A**

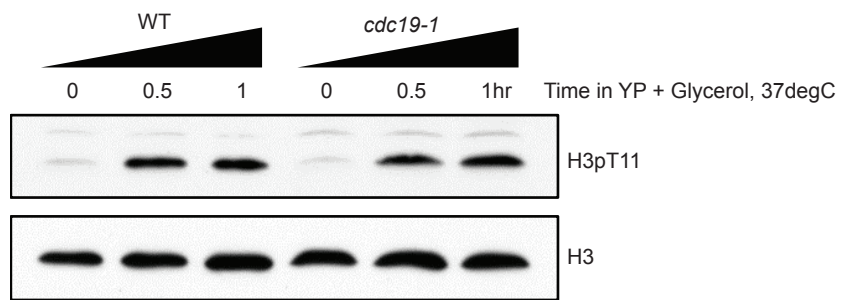

**B**

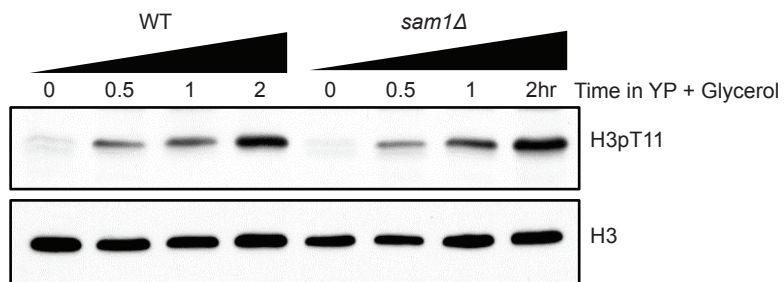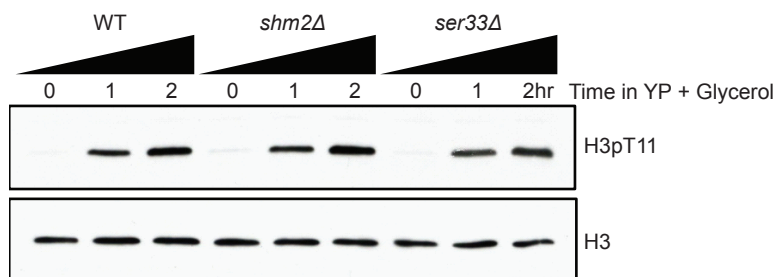

**Figure 4**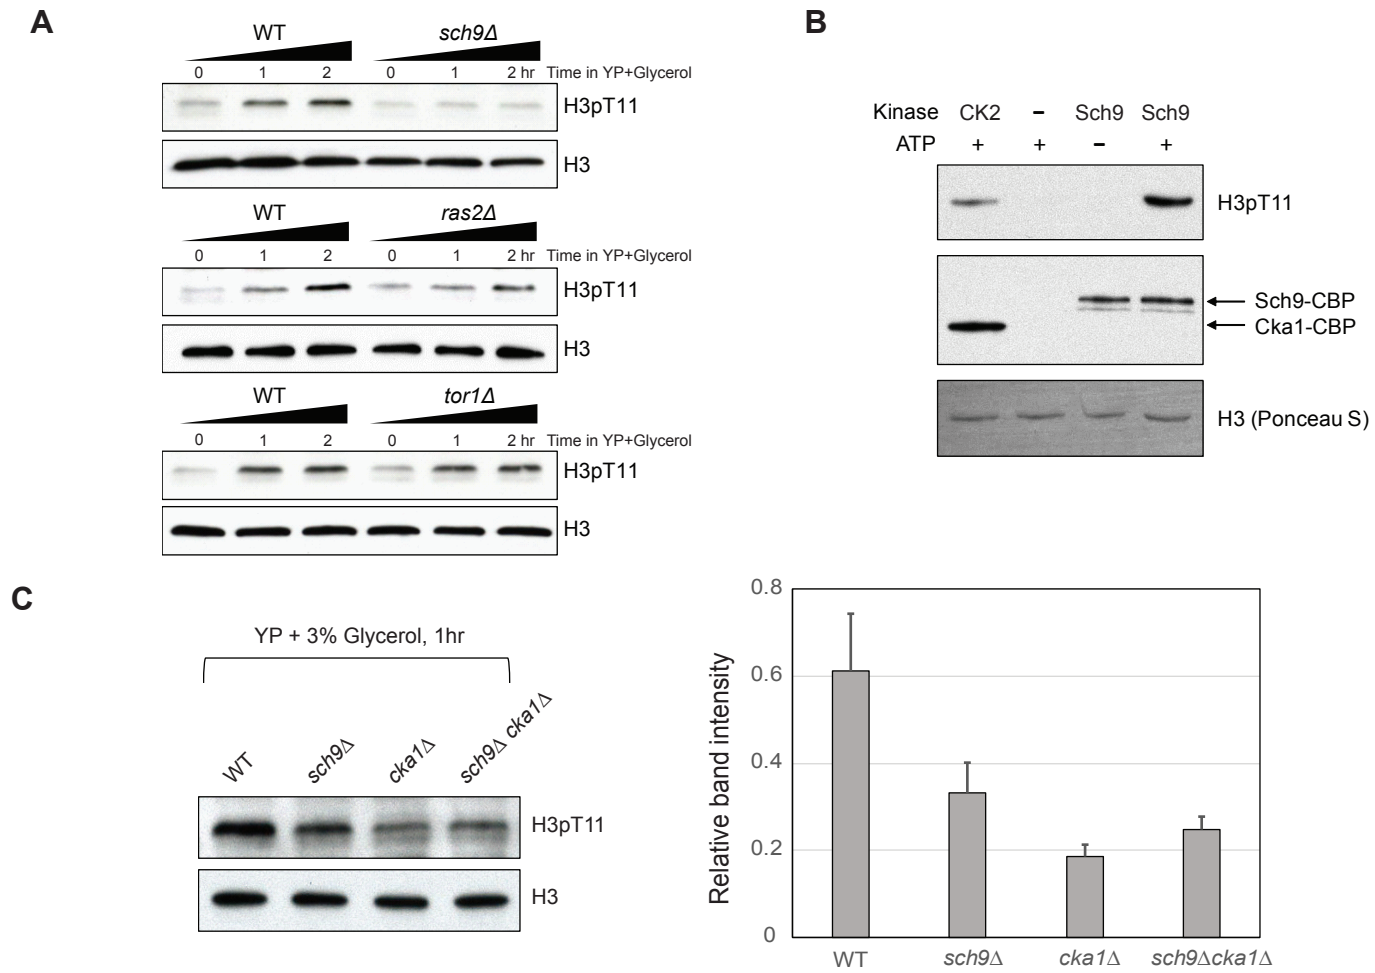

# Figure 5

bioRxiv preprint doi: <https://doi.org/10.1101/282384>; this version posted March 14, 2018. The copyright holder for this preprint (which was not certified by peer review) is the author/funder, who has granted bioRxiv a license to display the preprint in perpetuity. It is made available under aCC-BY 4.0 International license.

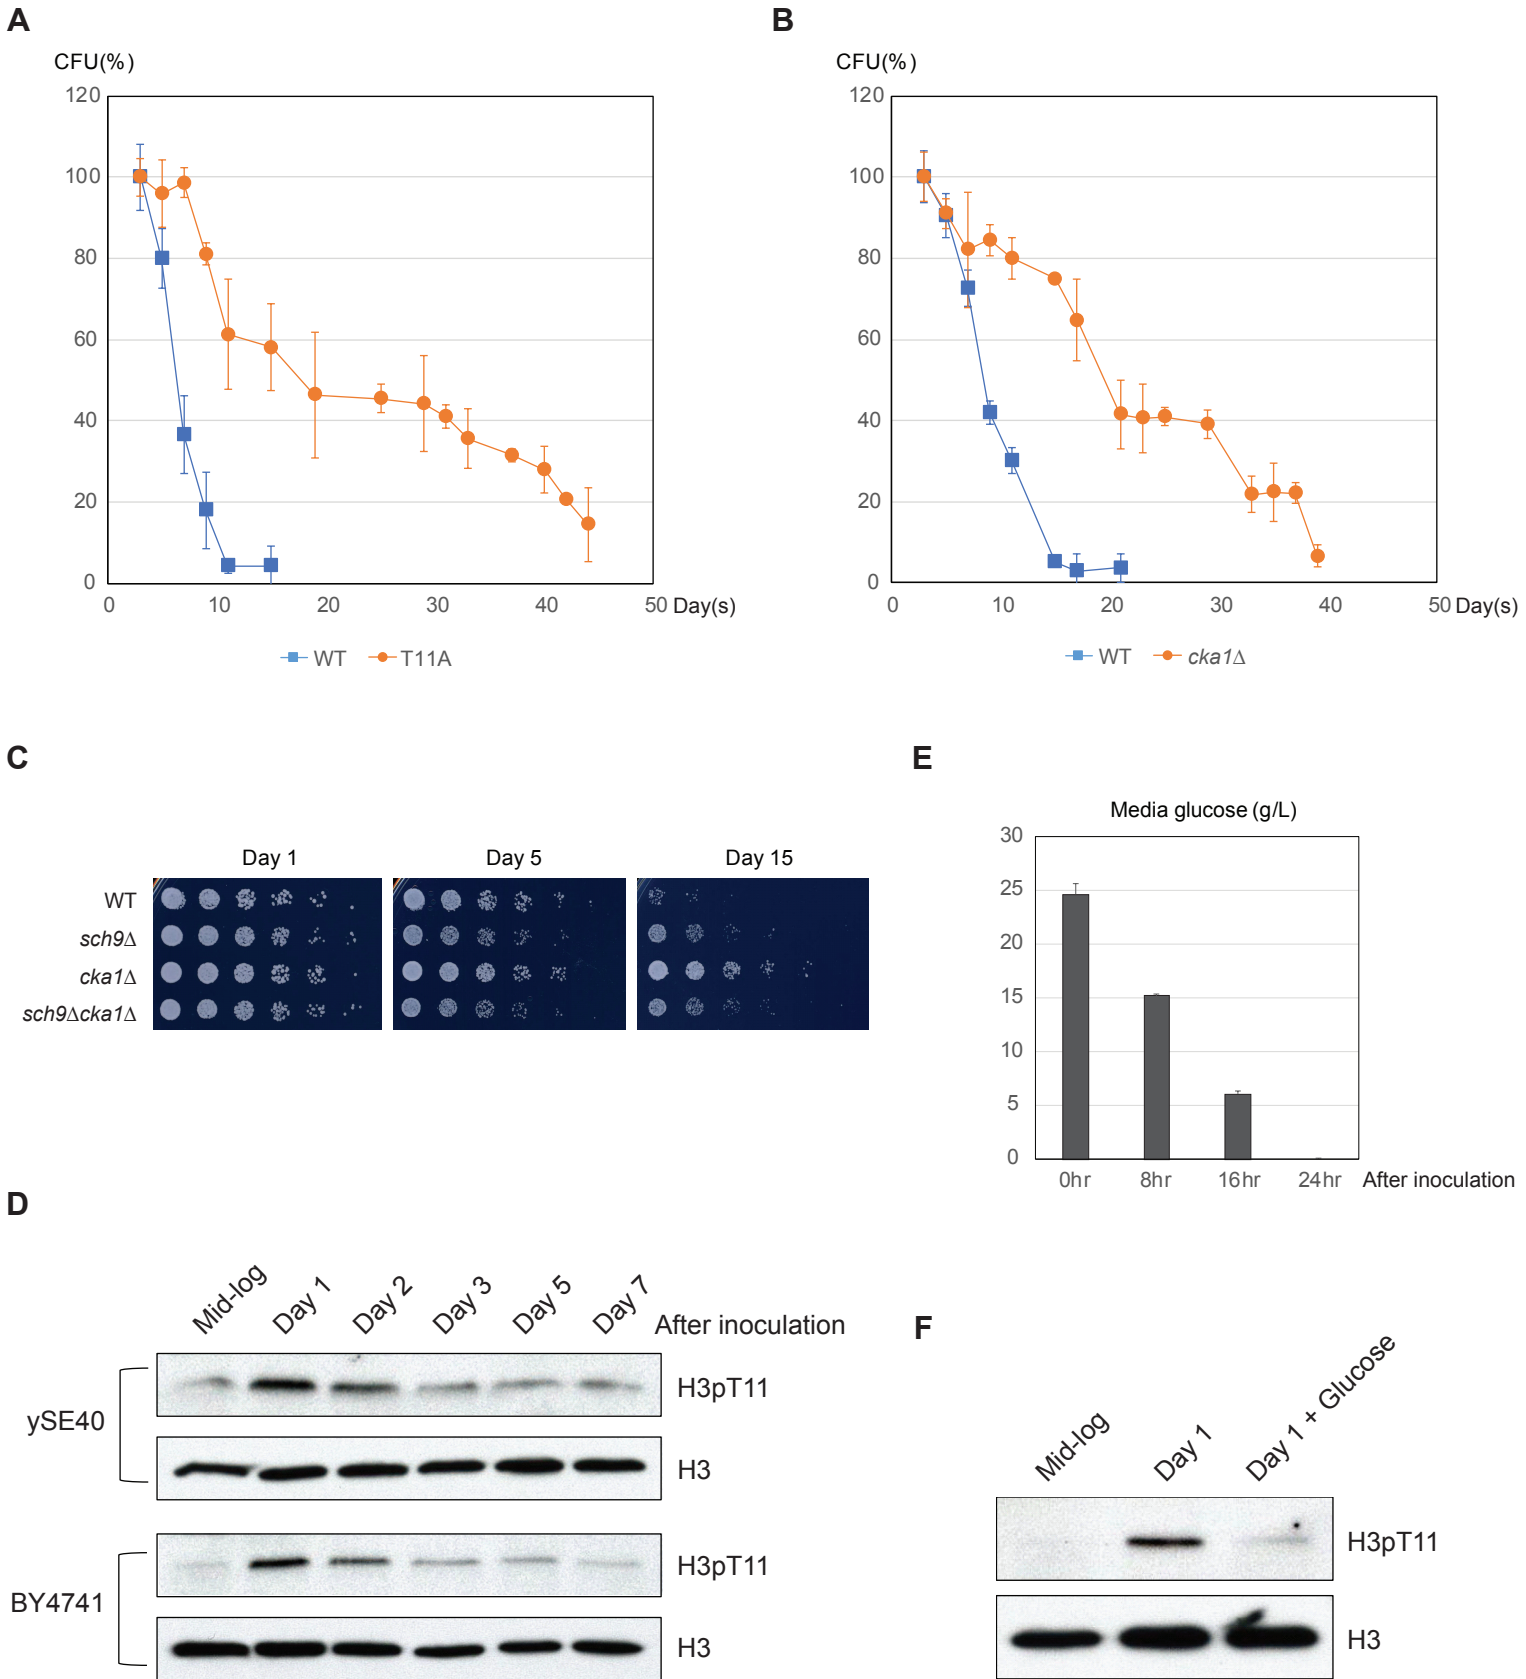

## Figure 6

**A**

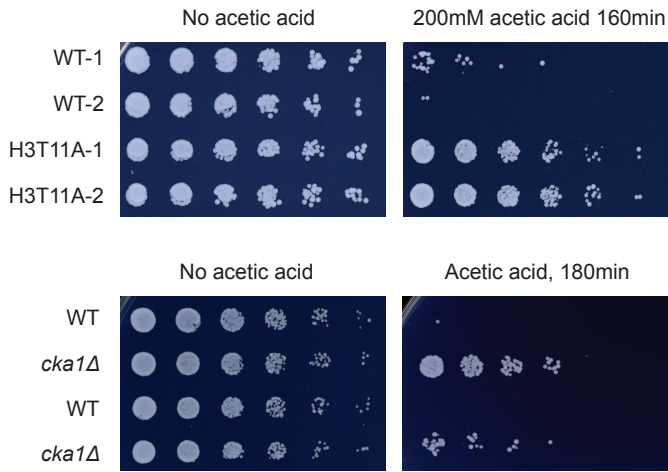

**B**

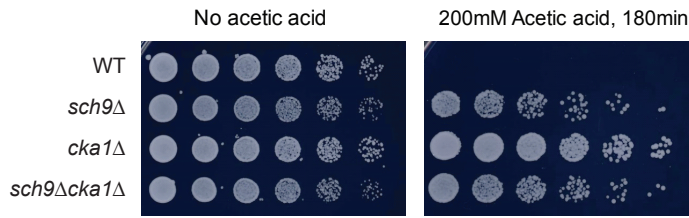

**D**

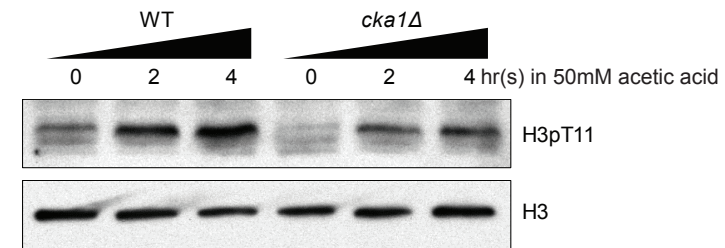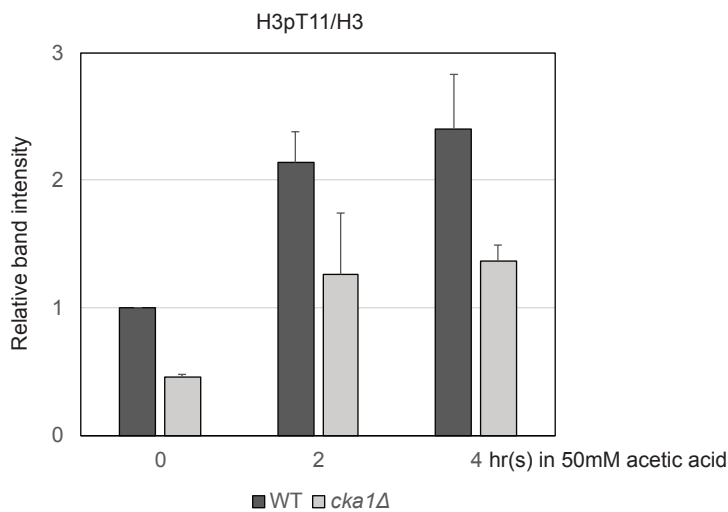

**C**

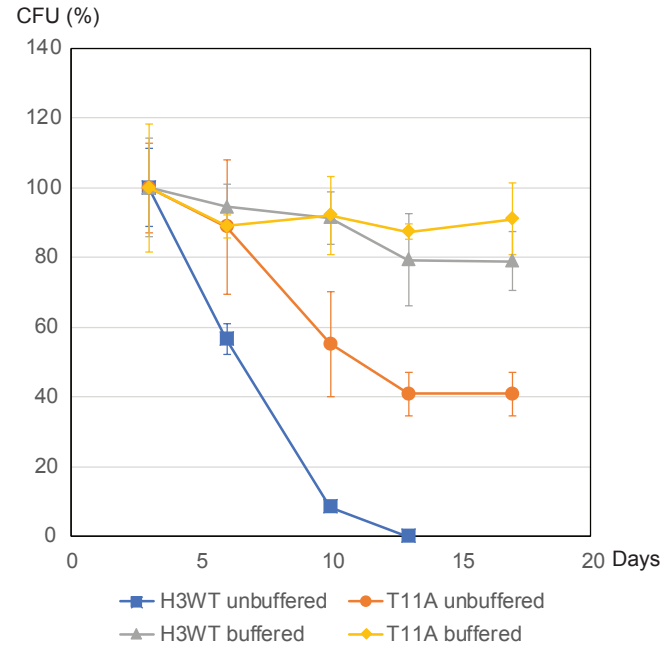

**E**

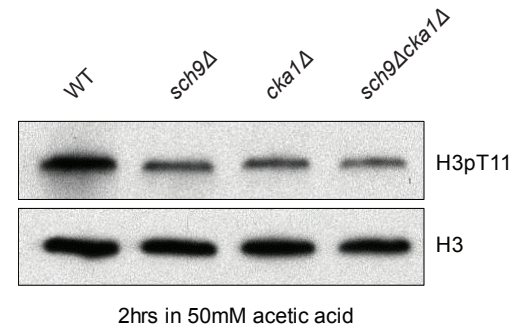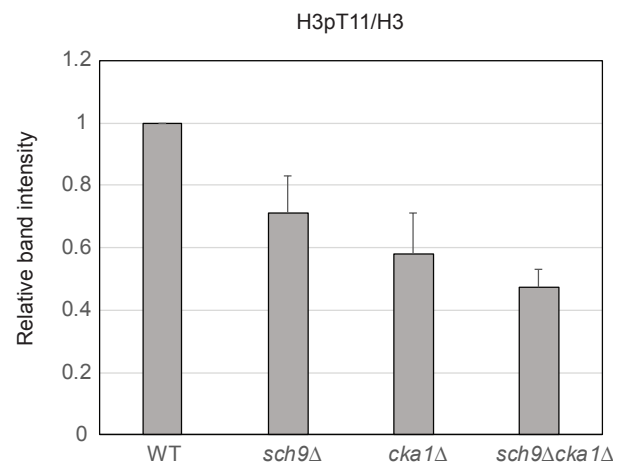



# Figure 6- figure supplement 1

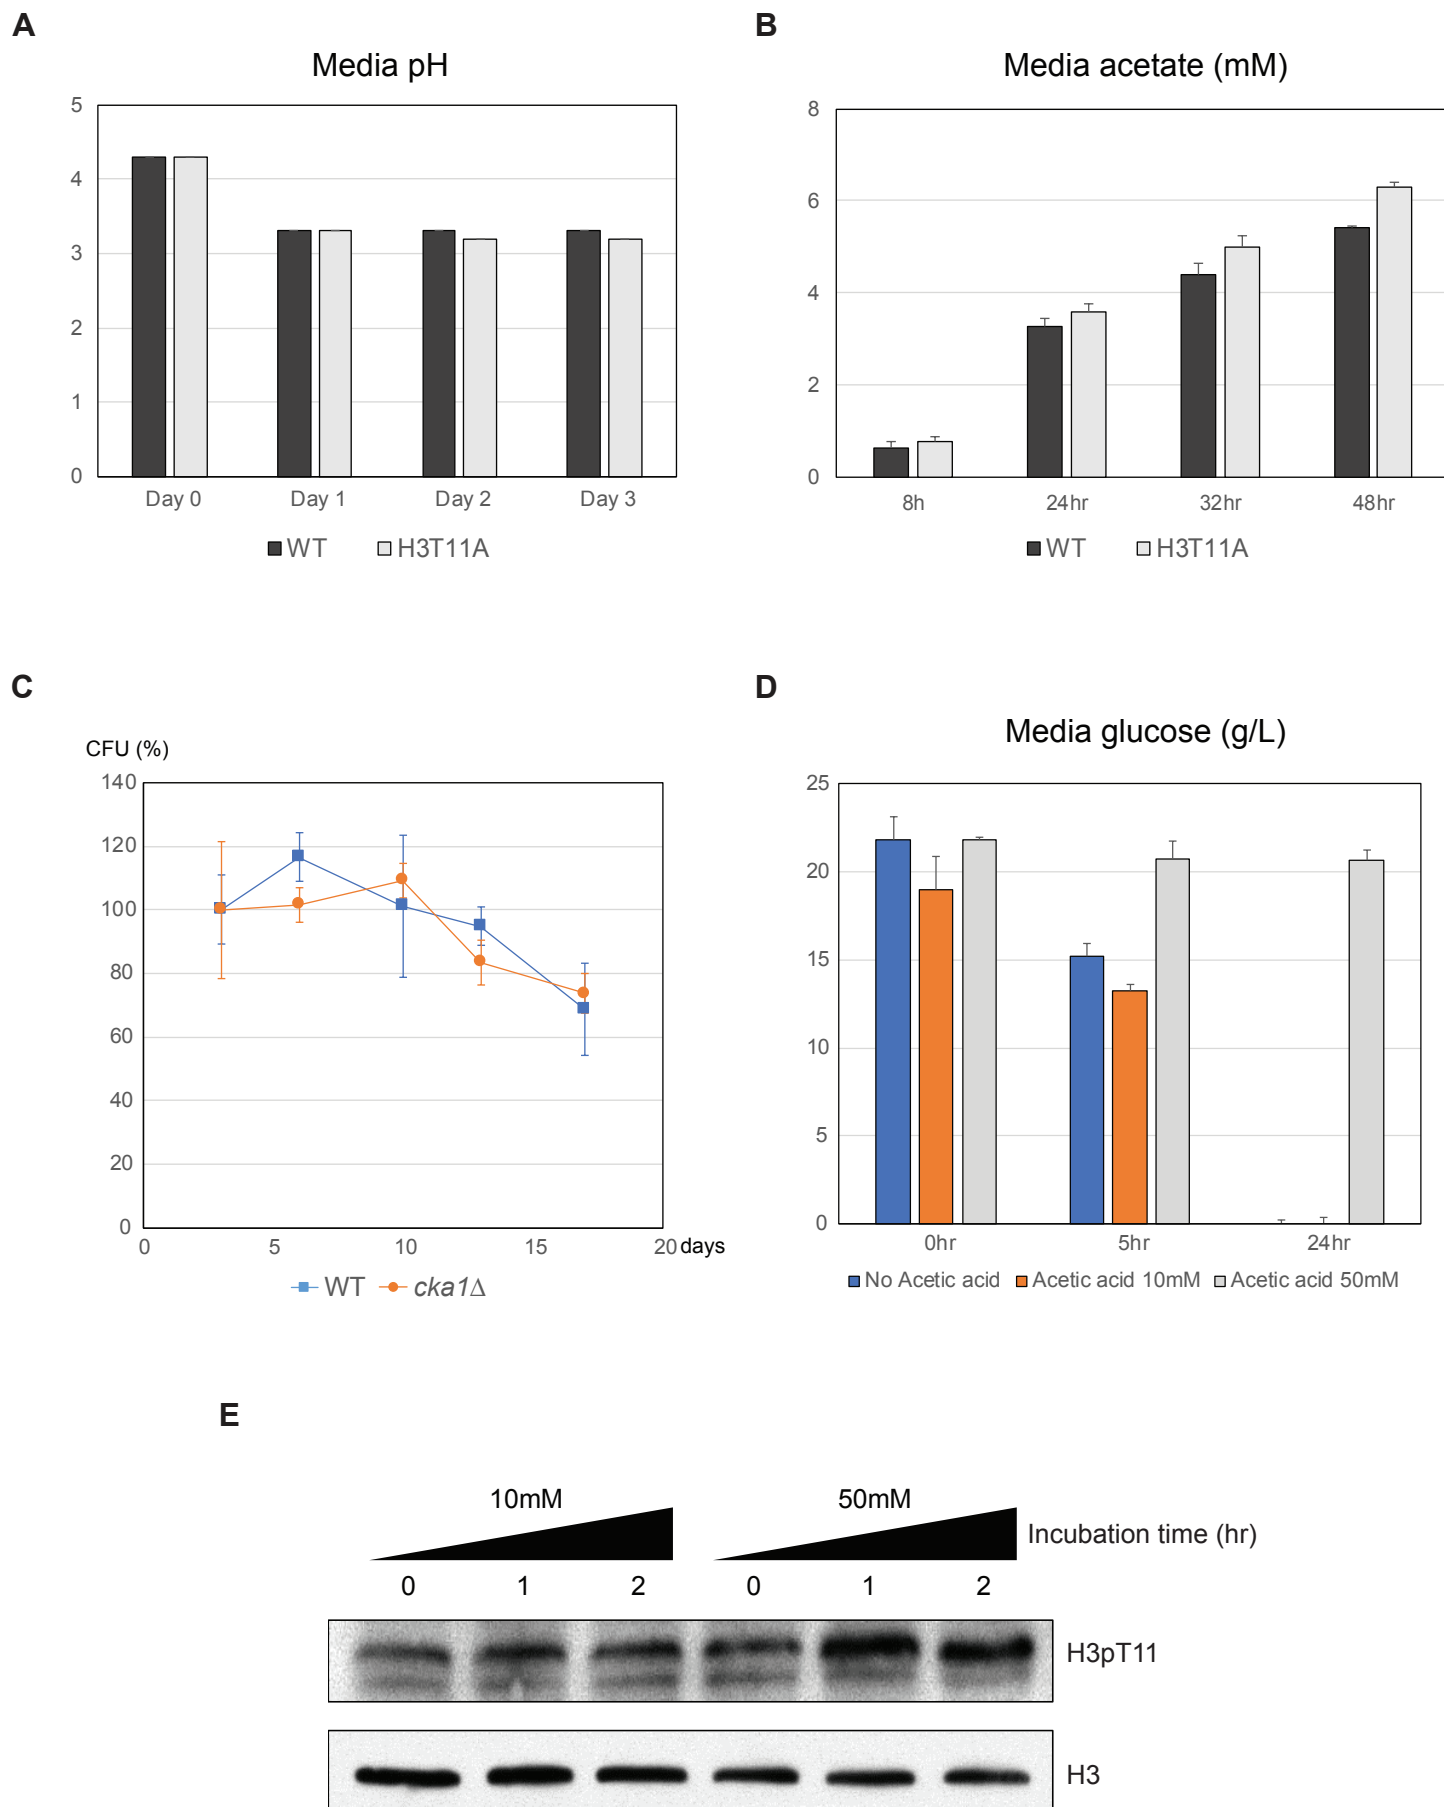

# Figure 7

**A**

17 $\beta$ -estradiol

-

+

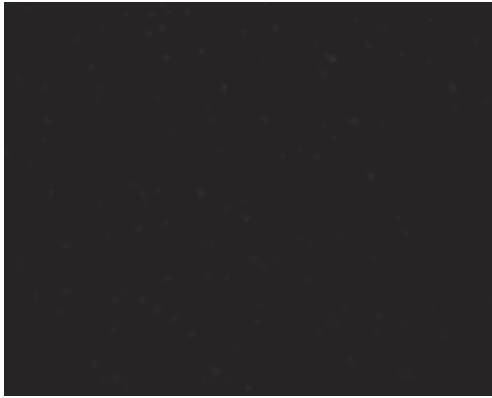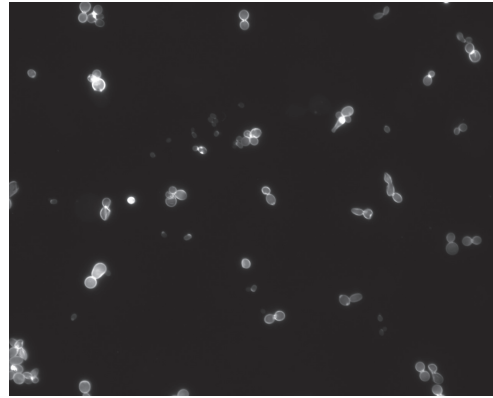

Calcofluor White M2R

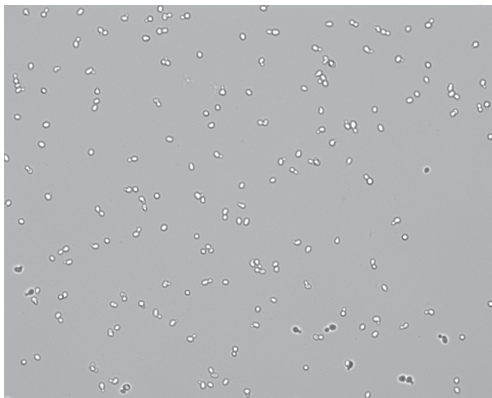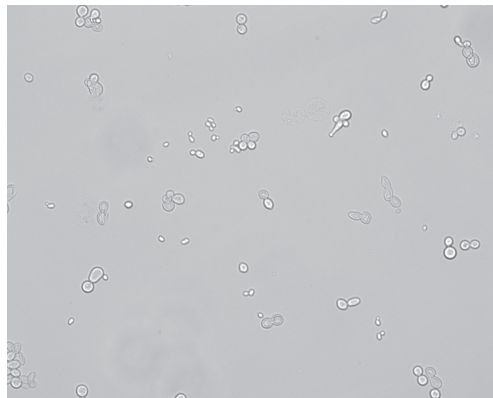

Phase contrast

**B**

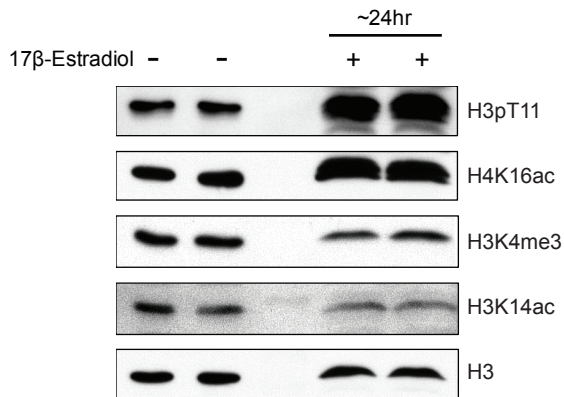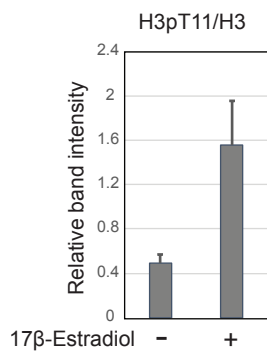

**C**

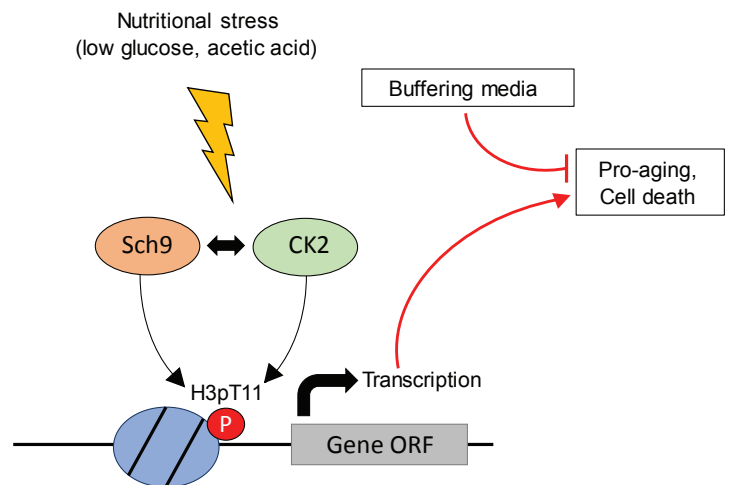

## Figure 7- figure supplement 1

A

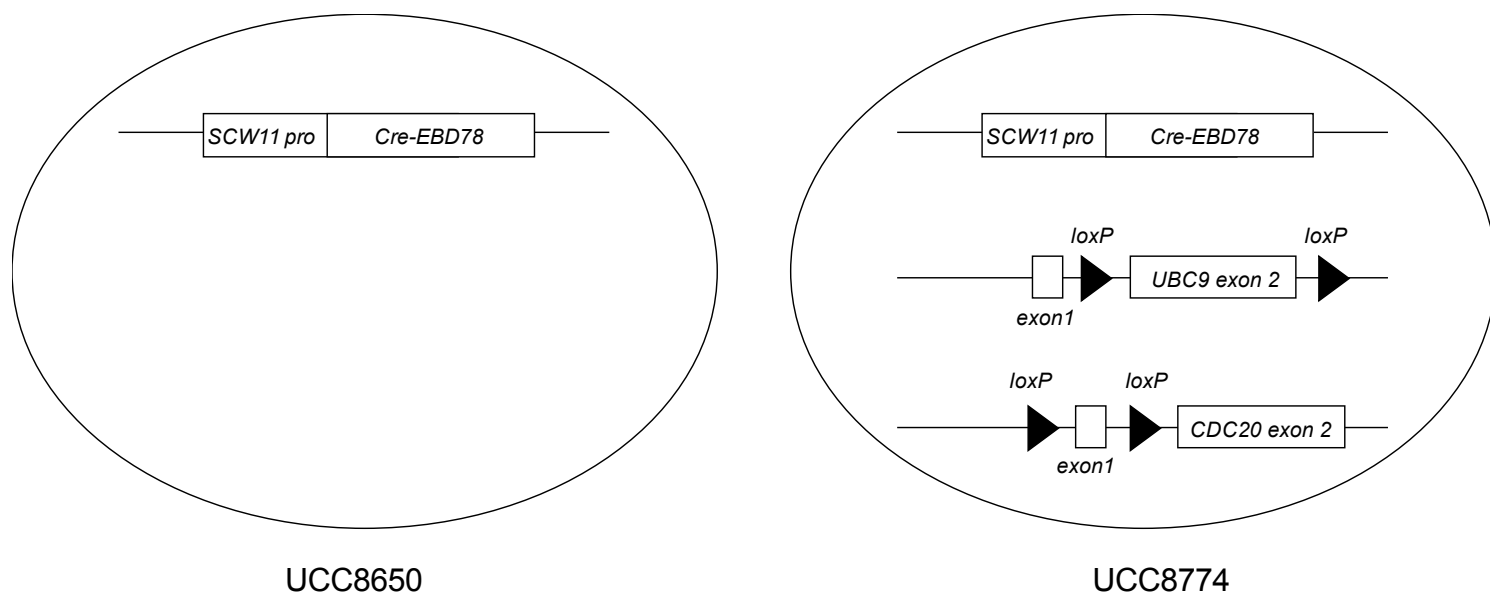

B

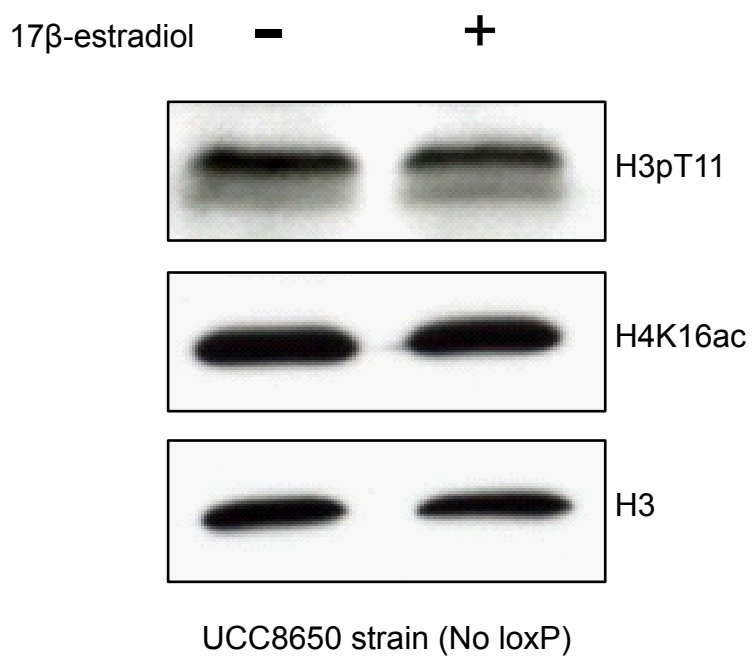

Source: http://biorxiv.org/content/10.1101/282384v1.full.pdf
